# Supplementary material
Source: PubMed Central journal article supplement (PMC10440725)
Supplement: NIHMS1923415-supplement-Table_S1_.pdf [file NIHMS1923415-supplement-Table_S1_.pdf]

| Canonical Pathways                                                            | CT-2A Vehicle Vs. D2C7-Day 9 -<br>2021-08-27 01:54 PM | CT-2A Vehicle Vs. CD40 Day 9-P<br>0.05 - 2021-08-27 01:49 PM | CT-2A-Vehicle Vs. D2C7+CD40 Day 9 P<br>0.05 - 2021-08-27 01:58 PM |
|-------------------------------------------------------------------------------|-------------------------------------------------------|--------------------------------------------------------------|-------------------------------------------------------------------|
| PPAR Signaling                                                                | -4.642                                                | 0                                                            | -0.447                                                            |
| PPARα/RXRα Activation                                                         | -2.683                                                | -0.816                                                       | 1.414                                                             |
| Phagosome Formation                                                           | 5.883                                                 | 3                                                            | -1.622                                                            |
| Breast Cancer Regulation by Stathmin1                                         | 3.796                                                 | 2.132                                                        | -2.121                                                            |
| Tumor Microenvironment Pathway                                                | 5.091                                                 | 0.577                                                        | -0.426                                                            |
| Cardiac Hypertrophy Signaling (Enhanced)                                      | 4.696                                                 | 0                                                            | -0.816                                                            |
| IL-6 Signaling                                                                | 4.644                                                 | -0.447                                                       | -0.333                                                            |
| Colorectal Cancer Metastasis Signaling                                        | 4.036                                                 | -0.333                                                       | -0.471                                                            |
| Role of Hypercytokinemia/hyperchemokine in the Pathogenesis of Influenza      | 5.831                                                 | 0                                                            | 3.606                                                             |
| Interferon Signaling                                                          | 2.84                                                  | 0                                                            | 2.828                                                             |
| Role of Pattern Recognition Receptors in Recognition of Bacteria and Viruses  | 3.413                                                 | 0                                                            | 2.236                                                             |
| Role of PKR in Interferon Induction and Antiviral Response                    | 3.683                                                 | 0                                                            | 2.333                                                             |
| Xenobiotic Metabolism AHR Signaling Pathway                                   | 2.5                                                   | 1.633                                                        | 1.342                                                             |
| IL-15 Production                                                              | 3.286                                                 | 1.89                                                         | 2.333                                                             |
| Necroptosis Signaling Pathway                                                 | 3.307                                                 | 2.449                                                        | 2.333                                                             |
| Crosstalk between Dendritic Cells and Natural Killer Cells                    | 4.583                                                 | 2.646                                                        | 2.828                                                             |
| Systemic Lupus Erythematosus In B Cell Signaling Pathway                      | 6.194                                                 | 2.121                                                        | 2.4                                                               |
| TREM1 Signaling                                                               | 4.707                                                 | 0                                                            | 1.633                                                             |
| Neuroinflammation Signaling Pathway                                           | 5.821                                                 | 0.816                                                        | 1.886                                                             |
| Production of Nitric Oxide and Reactive Oxygen Species in Macrophages         | 4.16                                                  | 1.667                                                        | 1.732                                                             |
| IL-17 Signaling                                                               | 4.522                                                 | 1.414                                                        | 1                                                                 |
| Acute Phase Response Signaling                                                | 5.286                                                 | 1.633                                                        | 1.155                                                             |
| Erythropoietin Signaling Pathway                                              | -1.234                                                | -1.89                                                        | -2.668                                                            |
| Superpathway of Cholesterol Biosynthesis                                      | -0.816                                                | -2.111                                                       | -2                                                                |
| Glioblastoma Multiforme Signaling                                             | 0.577                                                 | -1.633                                                       | -1.89                                                             |
| MSP-RON Signaling In Macrophages Pathway                                      | -0.18                                                 | -1                                                           | -2.121                                                            |
| LXR/RXR Activation                                                            | -2.959                                                | -1.134                                                       | -0.905                                                            |
| Amyotrophic Lateral Sclerosis Signaling                                       | -1.291                                                | -1                                                           | -1                                                                |
| Huntington's Disease Signaling                                                | -1.698                                                | 0                                                            | -1.89                                                             |
| Apelin Cardiac Fibroblast Signaling Pathway                                   | -2                                                    | 0                                                            | -1.134                                                            |
| Antioxidant Action of Vitamin C                                               | -1.789                                                | 0                                                            | -1                                                                |
| eNOS Signaling                                                                | 0.775                                                 | 1.414                                                        | 1.941                                                             |
| Apoptosis Signaling                                                           | -0.6                                                  | 2                                                            | 1.89                                                              |
| Opioid Signaling Pathway                                                      | 1.414                                                 | -1.633                                                       | -0.905                                                            |
| Role of NFAT in Cardiac Hypertrophy                                           | 1.043                                                 | -2.236                                                       | -1                                                                |
| P2Y Purigenic Receptor Signaling Pathway                                      | 2.353                                                 | -2                                                           | -0.816                                                            |
| ERK/MAPK Signaling                                                            | 2.535                                                 | -1.134                                                       | -0.378                                                            |
| Cardiac Hypertrophy Signaling                                                 | 2.263                                                 | -1.414                                                       | -1.265                                                            |
| cAMP-mediated signaling                                                       | 1.877                                                 | -1.342                                                       | -1.604                                                            |
| Estrogen Receptor Signaling                                                   | 2.335                                                 | -0.905                                                       | -1.291                                                            |
| Senescence Pathway                                                            | 2.654                                                 | -1                                                           | -1                                                                |
| ILK Signaling                                                                 | 3.162                                                 | -0.707                                                       | -2.333                                                            |
| Gα12/13 Signaling                                                             | 2.357                                                 | -1.342                                                       | -2.236                                                            |
| CXCR4 Signaling                                                               | 2.268                                                 | -1                                                           | -2.828                                                            |
| Integrin Signaling                                                            | 2.694                                                 | 0.378                                                        | -2.121                                                            |
| CREB Signaling in Neurons                                                     | 3.442                                                 | 0.408                                                        | -1.029                                                            |
| Hepatic Fibrosis Signaling Pathway                                            | 3.487                                                 | 0.302                                                        | -0.962                                                            |
| Ephrin Receptor Signaling                                                     | 3.053                                                 | 0                                                            | -1.89                                                             |
| NF-κB Activation by Viruses                                                   | 2.683                                                 | 0                                                            | -1.342                                                            |
| MSP-RON Signaling In Cancer Cells Pathway                                     | 3.138                                                 | 0                                                            | -1.414                                                            |
| ERK5 Signaling                                                                | 3.153                                                 | 0                                                            | -1.342                                                            |
| LPS/IL-1 Mediated Inhibition of RXR Function                                  | 2.837                                                 | 0                                                            | 1                                                                 |
| Retinoic acid Mediated Apoptosis Signaling                                    | 2.673                                                 | 0                                                            | 1.342                                                             |
| Th1 Pathway                                                                   | 3.674                                                 | 0                                                            | 1.508                                                             |
| p38 MAPK Signaling                                                            | 3.536                                                 | 0.447                                                        | 0.707                                                             |
| HMGB1 Signaling                                                               | 3.683                                                 | 0                                                            | 0.832                                                             |
| TNFR1 Signaling                                                               | 3.545                                                 | 0                                                            | 1                                                                 |
| Regulation Of The Epithelial Mesenchymal Transition By Growth Factors Pathway | 3.452                                                 | 1                                                            | -0.302                                                            |
| Natural Killer Cell Signaling                                                 | 3.781                                                 | 1                                                            | 0                                                                 |
| HIF1α Signaling                                                               | 3.015                                                 | 1                                                            | 0.229                                                             |
| Osteoarthritis Pathway                                                        | 2.714                                                 | 1.134                                                        | 0.333                                                             |
| Death Receptor Signaling                                                      | 2.611                                                 | 1                                                            | 0.333                                                             |
| PI3K Signaling in B Lymphocytes                                               | 3.43                                                  | -0.447                                                       | 0                                                                 |
| IL-8 Signaling                                                                | 3.812                                                 | 0.378                                                        | 0                                                                 |
| Toll-like Receptor Signaling                                                  | 3.578                                                 | 0                                                            | 0                                                                 |
| IL-1 Signaling                                                                | 3.771                                                 | 0                                                            | 0                                                                 |
| iNOS Signaling                                                                | 3.9                                                   | 0                                                            | 0                                                                 |
| Autophagy                                                                     | 2.611                                                 | 0                                                            | 0.707                                                             |
| Th2 Pathway                                                                   | 2.524                                                 | 0                                                            | 0.447                                                             |
| Gas Signaling                                                                 | 2.887                                                 | 0                                                            | 0.447                                                             |
| FAT10 Cancer Signaling Pathway                                                | 2.887                                                 | 0                                                            | 0.447                                                             |
| Leukocyte Extravasation Signaling                                             | 3                                                     | 0.378                                                        | -0.333                                                            |
| PI3K/AKT Signaling                                                            | 2.683                                                 | 0                                                            | -0.447                                                            |
| HER-2 Signaling in Breast Cancer                                              | 3.042                                                 | 0                                                            | -0.333                                                            |
| Role of RIG-I-like Receptors in Antiviral Innate Immunity                     | 3.051                                                 | 0                                                            | 0                                                                 |
| Oncostatin M Signaling                                                        | 3.207                                                 | 0                                                            | 0                                                                 |
| Inflammasome pathway                                                          | 3.162                                                 | 0                                                            | 0                                                                 |
| PDGF Signaling                                                                | 2.828                                                 | 0                                                            | 0                                                                 |
| Estrogen-Dependent Breast Cancer Signaling                                    | 2.84                                                  | 0                                                            | 0                                                                 |
| Role of IL-17F in Allergic Inflammatory Airway Diseases                       | 2.714                                                 | 0                                                            | 0                                                                 |
| B Cell Activating Factor Signaling                                            | 2.714                                                 | 0                                                            | 0                                                                 |
| TNFR2 Signaling                                                               | 2.668                                                 | 0                                                            | 0                                                                 |
| Chemokine Signaling                                                           | 2.673                                                 | 0                                                            | 0                                                                 |
| Corticotropin Releasing Hormone Signaling                                     | 1.213                                                 | 0.447                                                        | 1.342                                                             |
| Adrenomedullin signaling pathway                                              | 1.183                                                 | 0.905                                                        | 0.832                                                             |
| Activation of IRF by Cytosolic Pattern Recognition Receptors                  | 2.041                                                 | 0                                                            | 1.667                                                             |
| Ferroptosis Signaling Pathway                                                 | 1.671                                                 | -0.447                                                       | 0.707                                                             |
| IL-23 Signaling Pathway                                                       | 1.732                                                 | 0                                                            | 1                                                                 |
| Type II Diabetes Mellitus Signaling                                           | 1.964                                                 | 0                                                            | 1                                                                 |
| Induction of Apoptosis by HIV1                                                | 1.877                                                 | 0                                                            | 0.816                                                             |

|                                                                                                       |        |        |        |
|-------------------------------------------------------------------------------------------------------|--------|--------|--------|
| GNRH Signaling                                                                                        | 2.335  | 0      | -1     |
| Cholecystokinin/Gastrin-mediated Signaling                                                            | 2.6    | 0      | -0.816 |
| Telomerase Signaling                                                                                  | 2.111  | 0      | -1     |
| HGF Signaling                                                                                         | 2.041  | 0      | -1     |
| Neuregulin Signaling                                                                                  | 1.886  | 0      | -1     |
| GM-CSF Signaling                                                                                      | 1.897  | 0      | -1     |
| BMP signaling pathway                                                                                 | 1.667  | 0      | -1.342 |
| IL-3 Signaling                                                                                        | 1.698  | 0      | -1     |
| Aggrin Interactions at Neuromuscular Junction                                                         | 1.604  | 0      | -1     |
| NRF2-mediated Oxidative Stress Response                                                               | 1.414  | 0      | -1     |
| TGF-β Signaling                                                                                       | 1.508  | 0      | -0.816 |
| Ceramide Signaling                                                                                    | 2.236  | 0      | -0.447 |
| FLT3 Signaling in Hematopoietic Progenitor Cells                                                      | 1.807  | 0      | -0.447 |
| Aryl Hydrocarbon Receptor Signaling                                                                   | 2.065  | 0      | 0.378  |
| Glioma Invasiveness Signaling                                                                         | 2.065  | 0      | 0      |
| 4-1BB Signaling in T Lymphocytes                                                                      | 2.111  | 0      | 0      |
| JAK/STAT Signaling                                                                                    | 2.132  | 0      | 0      |
| FGF Signaling                                                                                         | 2.138  | 0      | 0      |
| Endoplasmic Reticulum Stress Pathway                                                                  | 2.236  | 0      | 0      |
| ERB2-ERBB3 Signaling                                                                                  | 2.309  | 0      | 0      |
| RANK Signaling in Osteoclasts                                                                         | 2.357  | 0      | 0      |
| Actin Nucleation by ARP-WASP Complex                                                                  | 2.496  | 0      | 0      |
| RAC Signaling                                                                                         | 2.524  | 0      | 0      |
| NGF Signaling                                                                                         | 2.449  | 0      | 0      |
| Differential Regulation of Cytokine Production in Macrophages and T Helper Cells by IL-17A and IL-17F | 2.449  | 0      | 0      |
| Differential Regulation of Cytokine Production in Intestinal Epithelial Cells by IL-17A and IL-17F    | 2.449  | 0      | 0      |
| CD40 Signaling                                                                                        | 1.528  | 0      | 0.447  |
| WNT/Ca+ pathway                                                                                       | 1.5    | 0      | 0      |
| Role of NANOG in Mammalian Embryonic Stem Cell Pluripotency                                           | 1.508  | 0      | 0      |
| HIPPO signaling                                                                                       | 1.667  | 0      | 0      |
| Prolactin Signaling                                                                                   | 1.606  | 0      | 0      |
| IL-7 Signaling Pathway                                                                                | 1.604  | 0      | 0      |
| Bladder Cancer Signaling                                                                              | 1.633  | 0      | 0      |
| Tumoricidal Function of Hepatic Natural Killer Cells                                                  | 1.633  | 0      | 0      |
| Gαq Signaling                                                                                         | 1.8    | 0      | 0      |
| April Mediated Signaling                                                                              | 1.807  | 0      | 0      |
| CD27 Signaling in Lymphocytes                                                                         | 1.807  | 0      | 0      |
| Thrombopoietin Signaling                                                                              | 1.807  | 0      | 0      |
| IL-9 Signaling                                                                                        | 1.732  | 0      | 0      |
| Neurotrophin/TRK Signaling                                                                            | 1.732  | 0      | 0      |
| Lymphotoxin β Receptor Signaling                                                                      | 1.732  | 0      | 0      |
| MIF-mediated Glucocorticoid Regulation                                                                | 1.732  | 0      | 0      |
| Renin-Angiotensin Signaling                                                                           | 1.964  | 0      | 0      |
| LPS-stimulated MAPK Signaling                                                                         | 1.964  | 0      | 0      |
| MIF Regulation of Innate Immunity                                                                     | 2      | 0      | 0      |
| Role of IL-17A in Psoriasis                                                                           | 2      | 0      | 0      |
| Renal Cell Carcinoma Signaling                                                                        | 1.897  | 0      | 0      |
| IL-2 Signaling                                                                                        | 1.897  | 0      | 0      |
| ERBB Signaling                                                                                        | 1.886  | 0      | 0      |
| Fcγ Receptor-mediated Phagocytosis in Macrophages and Monocytes                                       | 1.877  | 0      | 0      |
| GP6 Signaling Pathway                                                                                 | 1      | 2      | -0.707 |
| Xenobiotic Metabolism PXR Signaling Pathway                                                           | 1      | 0.905  | -1.667 |
| Signaling by Rho Family GTPases                                                                       | 1.915  | 1.342  | -1.342 |
| Gαi Signaling                                                                                         | 1.414  | 0      | -3.051 |
| Paxillin Signaling                                                                                    | 1.155  | 0      | -2     |
| mTOR Signaling                                                                                        | 1.46   | 0.378  | -2     |
| Actin Cytoskeleton Signaling                                                                          | 1.633  | -0.378 | -2.449 |
| Endocannabinoid Developing Neuron Pathway                                                             | 1.698  | 0      | -2.236 |
| fMLP Signaling in Neutrophils                                                                         | 1.528  | 0      | -2     |
| Regulation of Actin-based Motility by Rho                                                             | 1.941  | 0      | -2     |
| Unfolded protein response                                                                             | 1.941  | 0      | -2.236 |
| Synaptogenesis Signaling Pathway                                                                      | -0.316 | 0      | -0.832 |
| Apelin Liver Signaling Pathway                                                                        | -0.447 | 0      | -1.414 |
| Role of MAPK Signaling in Promoting the Pathogenesis of Influenza                                     | -0.728 | 0      | -1.633 |
| Insulin Receptor Signaling                                                                            | 0      | 0.816  | -2.449 |
| Retinoate Biosynthesis I                                                                              | 0      | 0      | -2     |
| Sphingosine-1-phosphate Signaling                                                                     | 0      | 0      | -2.236 |
| Antiproliferative Role of Somatostatin Receptor 2                                                     | 0.707  | 0      | -2     |
| Xenobiotic Metabolism General Signaling Pathway                                                       | 0.655  | 0      | -2     |
| Regulation Of The Epithelial Mesenchymal Transition In Development Pathway                            | 0.277  | 0      | -2     |
| Fc Epsilon RI Signaling                                                                               | 0.471  | 0      | -2     |
| G Beta Gamma Signaling                                                                                | 0.447  | 0      | -2     |
| Thrombin Signaling                                                                                    | 1.134  | -0.447 | -1.633 |
| HOTAIR Regulatory Pathway                                                                             | 1.826  | -0.447 | -1.508 |
| 14-3-3-mediated Signaling                                                                             | 1.147  | -1     | -1     |
| GDNF Family Ligand-Receptor Interactions                                                              | 1.291  | -1     | -1.342 |
| VEGF Signaling                                                                                        | 0.577  | -0.447 | -1     |
| VEGF Family Ligand-Receptor Interactions                                                              | 0.258  | 0      | -0.707 |
| Coagulation System                                                                                    | 0.302  | 0      | -1     |
| 3-phosphoinositide Biosynthesis                                                                       | 0.688  | 0      | -1     |
| Acute Myeloid Leukemia Signaling                                                                      | 0.5    | 0      | -1     |
| Ovarian Cancer Signaling                                                                              | 0.535  | 0      | -1.134 |
| Mouse Embryonic Stem Cell Pluripotency                                                                | 0.775  | 0      | -1.633 |
| SPINK1 General Cancer Pathway                                                                         | 0.905  | 0      | -1.342 |
| Intrinsic Prothrombin Activation Pathway                                                              | 1      | 0      | -1.342 |
| PAK Signaling                                                                                         | 1.069  | 0      | -1     |
| D-myo-inositol-5-phosphate Metabolism                                                                 | 1.091  | 0      | -1     |
| BEX2 Signaling Pathway                                                                                | 1      | 0      | -1     |
| 3-phosphoinositide Degradation                                                                        | 0.894  | 0      | -1     |
| TWEAK Signaling                                                                                       | 0.943  | 0      | -1     |
| D-myo-inositol (1,4,5,6)-Tetrakisphosphate Biosynthesis                                               | 0.943  | 0      | -1     |
| D-myo-inositol (3,4,5,6)-tetrakisphosphate Biosynthesis                                               | 0.943  | 0      | -1     |
| Insulin Secretion Signaling Pathway                                                                   | 1.859  | -1.134 | 0.447  |

|                                                                                 |        |        |        |
|---------------------------------------------------------------------------------|--------|--------|--------|
| Cardiac $\beta$ -adrenergic Signaling                                           | 0.905  | -1.342 | 0.816  |
| White Adipose Tissue Browning Pathway                                           | 0.832  | -1.134 | 0.816  |
| RHOGDI Signaling                                                                | -1.342 | -1.633 | 0      |
| Dopamine-DARPP32 Feedback in cAMP Signaling                                     | -0.655 | -1.134 | 0.816  |
| Superpathway of Geranylgeranyldiphosphate Biosynthesis I (via Mevalonate)       | -0.447 | -1.414 | 0      |
| Endocannabinoid Neuronal Synapse Pathway                                        | -0.5   | -1     | 0      |
| Mevalonate Pathway I                                                            | -0.447 | -0.816 | 0      |
| Synaptic Long Term Potentiation                                                 | 0.218  | -1.633 | -0.816 |
| UVA-Induced MAPK Signaling                                                      | 0.302  | -2     | 0      |
| Cholesterol Biosynthesis I                                                      | 0      | -2     | 0      |
| Cholesterol Biosynthesis III (via Desmosterol)                                  | 0      | -2     | 0      |
| Cholesterol Biosynthesis II (via 24,25-dihydrolanosterol)                       | 0      | -2     | 0      |
| Coronavirus Replication Pathway                                                 | 0      | -2     | 0      |
| Nitric Oxide Signaling in the Cardiovascular System                             | -1.667 | 0.447  | 1.134  |
| PD-1, PD-L1 cancer immunotherapy pathway                                        | -0.775 | 0      | 0.816  |
| WNT/ $\beta$ -catenin Signaling                                                 | -0.447 | -0.447 | 0.832  |
| Inhibition of Matrix Metalloproteases                                           | -1.508 | 0      | 0      |
| Basal Cell Carcinoma Signaling                                                  | -1.633 | 0      | 0      |
| Apelin Pancreas Signaling Pathway                                               | -1.633 | 0      | 0      |
| Sperm Motility                                                                  | -0.5   | -0.378 | 0      |
| UVB-Induced MAPK Signaling                                                      | -0.707 | 0      | 0      |
| BAG2 Signaling Pathway                                                          | -1.069 | 0      | 0      |
| Apelin Adipocyte Signaling Pathway                                              | -0.905 | 0      | 0      |
| AMPK Signaling                                                                  | 0.832  | 1.414  | 0      |
| Dopamine Degradation                                                            | 0      | 1      | 0      |
| Sumoylation Pathway                                                             | 0      | 1      | 0      |
| Role of MAPK Signaling in Inhibiting the Pathogenesis of Influenza              | 1.147  | 0      | 0.816  |
| Complement System                                                               | 0.707  | -0.447 | 0.707  |
| CDK5 Signaling                                                                  | 0.832  | -0.447 | 0.378  |
| Protein Kinase A Signaling                                                      | 0.905  | -0.632 | 0.535  |
| GPCR-Mediated Integration of Enteroendocrine Signaling Exemplified by an L Cell | 0.378  | -0.447 | 0      |
| Semaphorin Neuronal Repulsive Signaling Pathway                                 | 0.655  | -0.378 | 0      |
| Calcium Signaling                                                               | 0.905  | -1     | -0.378 |
| Ephrin B Signaling                                                              | 0.577  | -1     | 0      |
| Endocannabinoid Cancer Inhibition Pathway                                       | 0.577  | -0.816 | 0      |
| PDF Signaling                                                                   | 0.728  | 0.447  | -0.447 |
| Angiotensin Signaling                                                           | 1.213  | 0.447  | -0.707 |
| Endothelin-1 Signaling                                                          | 1.029  | 0.707  | 0.302  |
| Superpathway of Inositol Phosphate Compounds                                    | 1.4    | 0.447  | 0      |
| STAT3 Pathway                                                                   | 1.342  | 0.447  | 0.333  |
| p70S6K Signaling                                                                | 1.414  | -0.447 | 0      |
| Pancreatic Adenocarcinoma Signaling                                             | 1.147  | 0      | -0.447 |
| Apelin Endothelial Signaling Pathway                                            | 1.4    | 0      | -0.333 |
| Relaxin Signaling                                                               | 1.147  | 0      | 0      |
| Tryptophan Degradation III (Eukaryotic)                                         | 1.342  | 0      | 0      |
| Small Cell Lung Cancer Signaling                                                | 1.265  | 0      | 0      |
| Macropinocytosis Signaling                                                      | 1.265  | 0      | 0      |
| NAD Signaling Pathway                                                           | 0.816  | 0.378  | 0      |
| $\alpha$ -Adrenergic Signaling                                                  | 0.577  | 0      | 0      |
| CNTF Signaling                                                                  | 0.632  | 0      | 0      |
| UVC-Induced MAPK Signaling                                                      | 0.632  | 0      | 0      |
| Role of JAK1, JAK2 and TYK2 in Interferon Signaling                             | 1      | 0      | 0      |
| IL-17A Signaling in Airway Cells                                                | 1      | 0      | 0      |
| Androgen Signaling                                                              | 0.905  | 0      | 0      |
| ERBB4 Signaling                                                                 | 0.905  | 0      | 0      |
| p53 Signaling                                                                   | 0.832  | 0      | 0      |
| Regulation of Cellular Mechanics by Calpain Protease                            | 0.816  | 0      | 0      |
| Eicosanoid Signaling                                                            | 0.816  | 0      | 0      |
| IL-17A Signaling in Gastric Cells                                               | 0.816  | 0      | 0      |
| Coronavirus Pathogenesis Pathway                                                | 0.59   | 0      | 0.447  |
| Neuroprotective Role of THOP1 in Alzheimer's Disease                            | 0.302  | 0      | 0.816  |
| PTEN Signaling                                                                  | 0.243  | 0      | 0.447  |
| Inhibition of Angiogenesis by TSP1                                              | 0      | 0      | 0.447  |
| Synaptic Long Term Depression                                                   | -0.2   | 0.333  | 0      |
| Phospholipases                                                                  | 0      | 0.447  | 0      |
| Sirtuin Signaling Pathway                                                       | 0      | 0.378  | 0      |
| IL-22 Signaling                                                                 | 0.378  | 0      | 0      |
| Role of PI3K/AKT Signaling in the Pathogenesis of Influenza                     | 0.302  | 0      | 0      |
| IGF-1 Signaling                                                                 | 0.277  | 0      | 0      |
| ATM Signaling                                                                   | 0.258  | 0      | 0      |
| MYC Mediated Apoptosis Signaling                                                | 0.258  | 0      | 0      |
| CCR3 Signaling in Eosinophils                                                   | 0.258  | 0      | 0      |
| PCP (Planar Cell Polarity) Pathway                                              | -0.277 | 0      | 0      |
| GADD45 Signaling                                                                | 0      | 0      | 0      |
| Salvage Pathways of Pyrimidine Deoxyribonucleotides                             | 0      | 0      | 0      |
| Role of Cytokines in Mediating Communication between Immune Cells               | 0      | 0      | 0      |
| Xenobiotic Metabolism Signaling                                                 | 0      | 0      | 0      |
| Semaphorin Signaling in Neurons                                                 | 0      | 0      | 0      |
| G Protein Signaling Mediated by Tubby                                           | 0      | 0      | 0      |
| Ketogenesis                                                                     | 0      | 0      | 0      |
| Axonal Guidance Signaling                                                       | 0      | 0      | 0      |
| Sertoli Cell-Sertoli Cell Junction Signaling                                    | 0      | 0      | 0      |
| Ceramide Degradation                                                            | 0      | 0      | 0      |
| IL-17A Signaling in Fibroblasts                                                 | 0      | 0      | 0      |
| GABA Receptor Signaling                                                         | 0      | 0      | 0      |
| $\beta$ -alanine Degradation I                                                  | 0      | 0      | 0      |
| Pathogenesis of Multiple Sclerosis                                              | 0      | 0      | 0      |
| G-Protein Coupled Receptor Signaling                                            | 0      | 0      | 0      |
| Polyamine Regulation in Colon Cancer                                            | 0      | 0      | 0      |
| Sphingosine and Sphingosine-1-phosphate Metabolism                              | 0      | 0      | 0      |
| Caveolar-mediated Endocytosis Signaling                                         | 0      | 0      | 0      |
| IL-12 Signaling and Production in Macrophages                                   | 0      | 0      | 0      |
| Role of JAK1 and JAK3 in $\gamma$ c Cytokine Signaling                          | 0      | 0      | 0      |

|                                                                                |   |   |   |
|--------------------------------------------------------------------------------|---|---|---|
| Hepatic Fibrosis / Hepatic Stellate Cell Activation                            | 0 | 0 | 0 |
| Gap Junction Signaling                                                         | 0 | 0 | 0 |
| Germ Cell-Sertoli Cell Junction Signaling                                      | 0 | 0 | 0 |
| MSP-RON Signaling Pathway                                                      | 0 | 0 | 0 |
| Methylglyoxal Degradation I                                                    | 0 | 0 | 0 |
| Human Embryonic Stem Cell Pluripotency                                         | 0 | 0 | 0 |
| FAT10 Signaling Pathway                                                        | 0 | 0 | 0 |
| Tryptophan Degradation to 2-amino-3-carboxymuconate Semialdehyde               | 0 | 0 | 0 |
| Protein Ubiquitination Pathway                                                 | 0 | 0 | 0 |
| Parkinson's Signaling                                                          | 0 | 0 | 0 |
| Phenylalanine Degradation IV (Mammalian, via Side Chain)                       | 0 | 0 | 0 |
| Zymosterol Biosynthesis                                                        | 0 | 0 | 0 |
| FAK Signaling                                                                  | 0 | 0 | 0 |
| Clathrin-mediated Endocytosis Signaling                                        | 0 | 0 | 0 |
| Atherosclerosis Signaling                                                      | 0 | 0 | 0 |
| Circadian Rhythm Signaling                                                     | 0 | 0 | 0 |
| TR/RXR Activation                                                              | 0 | 0 | 0 |
| Phagosome Maturation                                                           | 0 | 0 | 0 |
| Ketolysis                                                                      | 0 | 0 | 0 |
| Role of MAPK Signaling in the Pathogenesis of Influenza                        | 0 | 0 | 0 |
| GDP-L-fucose Biosynthesis I (from GDP-D-mannose)                               | 0 | 0 | 0 |
| Agranulocyte Adhesion and Diapedesis                                           | 0 | 0 | 0 |
| Airway Pathology in Chronic Obstructive Pulmonary Disease                      | 0 | 0 | 0 |
| Inositol Pyrophosphates Biosynthesis                                           | 0 | 0 | 0 |
| Palmitate Biosynthesis I (Animals)                                             | 0 | 0 | 0 |
| Alanine Degradation III                                                        | 0 | 0 | 0 |
| Oxidative Ethanol Degradation III                                              | 0 | 0 | 0 |
| IL-4 Signaling                                                                 | 0 | 0 | 0 |
| Growth Hormone Signaling                                                       | 0 | 0 | 0 |
| Hepatic Cholestasis                                                            | 0 | 0 | 0 |
| Citrulline-Nitric Oxide Cycle                                                  | 0 | 0 | 0 |
| Role of Osteoblasts, Osteoclasts and Chondrocytes in Rheumatoid Arthritis      | 0 | 0 | 0 |
| Fatty Acid Biosynthesis Initiation II                                          | 0 | 0 | 0 |
| Oleate Biosynthesis II (Animals)                                               | 0 | 0 | 0 |
| Role of Tissue Factor in Cancer                                                | 0 | 0 | 0 |
| Cancer Drug Resistance By Drug Efflux                                          | 0 | 0 | 0 |
| RAR Activation                                                                 | 0 | 0 | 0 |
| IL-10 Signaling                                                                | 0 | 0 | 0 |
| Th1 and Th2 Activation Pathway                                                 | 0 | 0 | 0 |
| VDR/RXR Activation                                                             | 0 | 0 | 0 |
| Iron homeostasis signaling pathway                                             | 0 | 0 | 0 |
| Cellular Effects of Sildenafil (Viagra)                                        | 0 | 0 | 0 |
| Tryptophan Degradation X (Mammalian, via Tryptamine)                           | 0 | 0 | 0 |
| Role of JAK2 in Hormone-like Cytokine Signaling                                | 0 | 0 | 0 |
| Alanine Biosynthesis II                                                        | 0 | 0 | 0 |
| Apelin Muscle Signaling Pathway                                                | 0 | 0 | 0 |
| Adipogenesis pathway                                                           | 0 | 0 | 0 |
| Primary Immunodeficiency Signaling                                             | 0 | 0 | 0 |
| Regulation of the Epithelial-Mesenchymal Transition Pathway                    | 0 | 0 | 0 |
| Chronic Myeloid Leukemia Signaling                                             | 0 | 0 | 0 |
| Granulocyte Adhesion and Diapedesis                                            | 0 | 0 | 0 |
| Putrescine Degradation III                                                     | 0 | 0 | 0 |
| Prostate Cancer Signaling                                                      | 0 | 0 | 0 |
| Cysteine Biosynthesis/Homocysteine Degradation                                 | 0 | 0 | 0 |
| PXR/RXR Activation                                                             | 0 | 0 | 0 |
| Glucocorticoid Receptor Signaling                                              | 0 | 0 | 0 |
| Role of IL-17A in Arthritis                                                    | 0 | 0 | 0 |
| Extrinsic Prothrombin Activation Pathway                                       | 0 | 0 | 0 |
| Role of Macrophages, Fibroblasts and Endothelial Cells in Rheumatoid Arthritis | 0 | 0 | 0 |
| Tight Junction Signaling                                                       | 0 | 0 | 0 |
| Molecular Mechanisms of Cancer                                                 | 0 | 0 | 0 |
| Virus Entry via Endocytic Pathways                                             | 0 | 0 | 0 |
| Spermidine Biosynthesis I                                                      | 0 | 0 | 0 |
| Noradrenaline and Adrenaline Degradation                                       | 0 | 0 | 0 |
| Antigen Presentation Pathway                                                   | 0 | 0 | 0 |
| FXR/RXR Activation                                                             | 0 | 0 | 0 |
| Remodeling of Epithelial Adherens Junctions                                    | 0 | 0 | 0 |
| Superpathway of Citrulline Metabolism                                          | 0 | 0 | 0 |
| Role of JAK family kinases in IL-6-type Cytokine Signaling                     | 0 | 0 | 0 |

|                                                                              | CT-2A Vehicle Vs. D2C7 | CT-2A Vehicle Vs. CD40 | CT-2A-Vehicle Vs. D2C7+CD40 |
|------------------------------------------------------------------------------|------------------------|------------------------|-----------------------------|
| Systemic Lupus Erythematosus In B Cell Signaling Pathway                     | 6.194                  | 2.121                  | 2.4                         |
| Crosstalk between Dendritic Cells and Natural Killer Cells                   | 4.583                  | 2.646                  | 2.828                       |
| Role of Hypercytokinemia/hyperchemokineemia in the Pathogenesis of Influenza | 5.831                  | 0                      | 3.606                       |
| Neuroinflammation Signaling Pathway                                          | 5.821                  | 0.816                  | 1.886                       |
| Necroptosis Signaling Pathway                                                | 3.307                  | 2.449                  | 2.333                       |
| Acute Phase Response Signaling                                               | 5.286                  | 1.633                  | 1.155                       |
| Production of Nitric Oxide and Reactive Oxygen Species in Macrophages        | 4.16                   | 1.667                  | 1.732                       |
| IL-15 Production                                                             | 3.286                  | 1.89                   | 2.333                       |
| Phagosome Formation                                                          | 5.883                  | 3                      | -1.622                      |
| IL-17 Signaling                                                              | 4.522                  | 1.414                  | 1                           |
| TREM1 Signaling                                                              | 4.707                  | 0                      | 1.633                       |
| Role of PKR in Interferon Induction and Antiviral Response                   | 3.683                  | 0                      | 2.333                       |
| Interferon Signaling                                                         | 2.84                   | 0                      | 2.828                       |
| Role of Pattern Recognition Receptors in Recognition of Bacteria and Viruses | 3.413                  | 0                      | 2.236                       |
| Xenobiotic Metabolism AHR Signaling Pathway                                  | 2.5                    | 1.633                  | 1.342                       |
| Tumor Microenvironment Pathway                                               | 5.091                  | 0.577                  | -0.426                      |
| Th1 Pathway                                                                  | 3.674                  | 0                      | 1.508                       |
| Natural Killer Cell Signaling                                                | 3.781                  | 1                      | 0                           |
| p38 MAPK Signaling                                                           | 3.536                  | 0.447                  | 0.707                       |
| TNFR1 Signaling                                                              | 3.545                  | 0                      | 1                           |

"N/A" values were changed to 0. The z scores of each row were summed, then the summed values were ranked from highest to lowest. A heatmap of the rows containing the top 20 summed values was created using GraphPad Prism version 9.

© 2000-2021 QIAGEN. All rights reserved.

Genes in the Role of Pattern Recognition

Receptors in Recognition of Bacteria and

Viruses network

CT-2A Vehicle Vs. D2C7-Day  
9 - 2021-08-27 01:54 PM

CT-2A Vehicle Vs. CD40 Day 9-  
P 0.05 - 2021-08-27 01:49 PM

CT-2A-Vehicle Vs. D2C7+CD40 Day 9  
P 0.05 - 2021-08-27 01:58 PM

|         |             |             |              |
|---------|-------------|-------------|--------------|
| IL12B   | 5.002820353 | 3.021690216 | 4.584145266  |
| PTX3    | 6.195421942 | 1.107430886 | 3.980370783  |
| IL6     | 6.71796393  | 0           | 4.413824946  |
| TNF     | 4.602636284 | 0.271717237 | 3.297161077  |
| IL21    | 4.6945071   | 0           | 3.202278086  |
| TNFSF8  | 3.80930142  | 1.620447407 | 2.02134116   |
| C3      | 3.204103744 | 2.251852198 | 1.863066623  |
| LIF     | 4.714748722 | 0.528288952 | 1.658023977  |
| IL1A    | 3.348667085 | 0.123899367 | 2.329987101  |
| CLEC6A  | 2.733697532 | 1.368532122 | 1.02525123   |
| IL1B    | 3.296967183 | 0.080773387 | 1.720694491  |
| IFNB1   | 5.03396532  | 0           | 0            |
| OSM     | 2.550098221 | 0.513723851 | 1.702504764  |
| FASLG   | 1.097755994 | 1.749168762 | 1.275375575  |
| TLR2    | 2.306625414 | 0.344836139 | 1.230946844  |
| NFKB2   | 2.400703641 | 0.461591082 | 0.997491011  |
| NLRP3   | 2.260222485 | 0.331281877 | 1.173990433  |
| CCL5    | 1.173644228 | 1.593852882 | 0.989870727  |
| OAS1    | 1.626564919 | 0.915557739 | 1.145489335  |
| CSAR1   | 1.931984843 | 0.752232095 | 0.561248025  |
| Oas1b   | 1.521367541 | 0.308651884 | 1.289512842  |
| OAS3    | 1.60659606  | 0.831046388 | 0.644009808  |
| RELB    | 1.777794597 | 0.349570344 | 0.938069664  |
| IRF7    | 1.102503345 | 0.864761638 | 1.072857919  |
| DDX58   | 1.64404709  | 0.433505524 | 0.902790933  |
| IFIH1   | 1.400026042 | 0.598095487 | 0.918272228  |
| C5      | 1.033114845 | 0.67508842  | 1.206004095  |
| NOD2    | 1.420424445 | 0.533973817 | 0.802489779  |
| CLEC7A  | 0.941809571 | 1.216956991 | 0.523390168  |
| IL17C   | 2.636835089 | 0           | 0            |
| TNFSF10 | 0.202328258 | 1.112668448 | 1.276070686  |
| EIF2AK2 | 1.393734243 | 0.379040425 | 0.76999333   |
| LTB     | 1.082493272 | 0.867859773 | 0.576478669  |
| CD70    | 2.515987721 | 0           | 0            |
| TNFSF14 | 2.487760699 | 0           | 0            |
| RIPK2   | 1.444438802 | 0.289906544 | 0.744498476  |
| OAS2    | 1.332132245 | 0.460415323 | 0.623204789  |
| PRKCD   | 0.544150364 | 0.899450731 | 0.767713356  |
| SYK     | 1.314122388 | 0.49931998  | 0.3892798    |
| TLR5    | 1.388951361 | 0.260966419 | 0.451439079  |
| NOD1    | 0.491350485 | 0.784660308 | 0.817540155  |
| TLR6    | 1.124463478 | 0.551124512 | 0.340554027  |
| TNFSF15 | 2.010233176 | 0           | 0            |
| Tnfsf9  | 1.45087511  | 0.125107426 | 0.383025231  |
| MYD88   | 1.175582163 | 0.286882795 | 0.346188403  |
| PLCG2   | 1.041064449 | 0.261819131 | 0.428317482  |
| TLR3    | 0.700056687 | 0.46784743  | 0.508597869  |
| TLR8    | 1.419955985 | 0.893038181 | -0.647730839 |
| NFKB1   | 1.172426493 | 0.132291119 | 0.301820118  |
| CLCF1   | 1.519984055 | 0.184534724 | -0.249433083 |
| IL33    | 1.035021622 | 0.227411028 | 0.185614165  |
| TLR9    | 0.736171895 | 0.341744793 | 0.359259488  |
| CNTF    | 0.902034995 | 0.453100505 | -0.086919457 |
| C1QA    | 0.508640669 | 0.5362456   | 0.215848158  |

|                         |              |              |              |
|-------------------------|--------------|--------------|--------------|
| TLR4                    | 0.949339393  | 0.371076826  | -0.109606529 |
| TGFB2                   | 0.283525931  | 0.369567929  | 0.553831394  |
| REL                     | 0.841948717  | 0.096740388  | 0.15142473   |
| RELA                    | 0.895714857  | -0.050925784 | 0.215241288  |
| TGFB1                   | 0.597592849  | 0.300328432  | 0.161665162  |
| C1QB                    | 0.432479503  | 0.433760886  | 0.171511661  |
| Oas1d (includes others) | 0.401912351  | 0.112252819  | 0.46091027   |
| PRKCQ                   | 0.060656848  | 0.398433692  | 0.51150532   |
| C1QC                    | 0.368155441  | 0.415194047  | 0.162098515  |
| NLRC4                   | 0.678516297  | 0.415367311  | -0.157864629 |
| TNFSF13B                | 0.249162196  | 0.127901203  | 0.517144949  |
| TLR1                    | 0.837540093  | -0.024373405 | 0.075136065  |
| PIK3R5                  | 0.80804434   | 0.049742929  | -0.021408408 |
| TLR7                    | 0.527818538  | 0.425761826  | -0.151734094 |
| IL15                    | 0.155132699  | 0.45654949   | 0.136773606  |
| IL11                    | 1.168960036  | -0.402164107 | -0.022354182 |
| C3AR1                   | 1.159475399  | 0.127672668  | -0.571530936 |
| CASP1                   | -0.002728729 | 0.391956318  | 0.216785891  |
| PIK3C2A                 | 0.17113773   | 0.143392968  | 0.081277808  |
| TRAF6                   | 0.16993084   | 0.160588867  | 0.038852388  |
| EIF2S1                  | 0.314848343  | -0.013269146 | 0.003998079  |
| PIK3CD                  | 0.08560683   | 0.106588745  | 0.032335059  |
| PIK3R4                  | 0.082123714  | 0.014628676  | 0.112869671  |
| RNASEL                  | -0.071329452 | 0.134968701  | 0.113895585  |
| PIK3CB                  | 0.005707305  | 0.050044343  | 0.094772401  |
| PIK3R1                  | 0.090616473  | 0.105404408  | -0.059268406 |
| MAVS                    | 0.189311199  | 0.012418715  | -0.079874814 |
| PRKD3                   | 0.120974384  | 0.061503214  | -0.066197824 |
| IL4                     | -0.144479968 | 0.089949863  | 0.131056768  |
| PRKCI                   | 0.067616121  | -0.043696346 | 0.008431759  |
| PRKD1                   | 0.308641783  | -0.102014985 | -0.235282105 |
| MAP2K4                  | -0.108832438 | -0.026168041 | 0.089245448  |
| MAPK9                   | -0.11835926  | 0.026761696  | 0.030545302  |
| TNFSF13                 | -0.279388639 | 0.457063578  | -0.246936614 |
| PIK3C3                  | -0.083909157 | -0.013351894 | -0.003418973 |
| CREB1                   | 0.021128267  | 0.016780122  | -0.14597227  |
| IL18                    | -0.274179793 | 0.072281319  | 0.065360837  |
| PIK3R3                  | -0.069674449 | -0.069099987 | -0.021780875 |
| MAPK3                   | -0.311851133 | 0.041258372  | 0.086017214  |
| MAPK1                   | -0.093955885 | -0.071214986 | -0.026485476 |
| IRF3                    | -0.043232316 | -0.033148286 | -0.130616559 |
| PRKCH                   | 0.409583859  | -0.195204268 | -0.430119543 |
| PIK3CA                  | -0.107587709 | -0.032997404 | -0.119026673 |
| TNFSF12                 | -0.070596002 | -0.005293    | -0.207809369 |
| PRKCA                   | -0.217502124 | 0.02408972   | -0.094750016 |
| MAPK10                  | -0.288189516 | -0.052130967 | 0.006132742  |
| PIK3R6                  | -0.104992839 | -0.123508662 | -0.118783111 |
| PIK3CG                  | 0.110919912  | -0.006315033 | -0.463503018 |
| MAPK8                   | -0.16706155  | -0.148369929 | -0.086953859 |
| PIK3C2B                 | 0.014816371  | -0.101435879 | -0.430512885 |
| TICAM1                  | -0.10729324  | -0.12272447  | -0.331466205 |
| PRKCE                   | -0.284472768 | -0.19294311  | -0.085376909 |
| IL12A                   | -0.615332549 | 0.176413917  | -0.277577946 |
| PRKCG                   | -0.65554932  | -0.236090578 | 0.074696828  |
| IL17D                   | -0.439851524 | -0.275073667 | -0.227903223 |
| PRKCB                   | -0.293272205 | -0.249824306 | -0.403979835 |
| PIK3R2                  | -0.460981554 | -0.261345627 | -0.239857179 |
| Eda                     | -0.536937372 | -0.321476618 | -0.118547984 |

|        |              |              |              |
|--------|--------------|--------------|--------------|
| PRKCZ  | -0.408812256 | -0.244202675 | -0.373630935 |
| TGFB3  | -0.310914911 | -0.265450547 | -0.480871327 |
| MAPK12 | -0.42165881  | -0.322033441 | -0.318810282 |



|        | CT-2A Vehicle Vs. D2C7 | CT-2A Vehicle Vs. CD40 | CT-2A-Vehicle Vs. D2C7+CD40 |
|--------|------------------------|------------------------|-----------------------------|
| IL12B  | 5.002820353            | 3.021690216            | 4.584145266                 |
| PTX3   | 6.195421942            | 1.107430886            | 3.980370783                 |
| IL6    | 6.71796393             | 0                      | 4.413824946                 |
| TNF    | 4.602636284            | 0.271717237            | 3.297161077                 |
| IL21   | 4.6945071              | 0                      | 3.202278086                 |
| TNFSF8 | 3.80930142             | 1.620447407            | 2.02134116                  |
| C3     | 3.204103744            | 2.251852198            | 1.863066623                 |
| LIF    | 4.714748722            | 0.528288952            | 1.658023977                 |
| IL1A   | 3.348667085            | 0.123899367            | 2.329987101                 |
| CLEC6A | 2.733697532            | 1.368532122            | 1.02525123                  |
| IL1B   | 3.296967183            | 0.080773387            | 1.720694491                 |
| IFNB1  | 5.03396532             | 0                      | 0                           |
| OSM    | 2.550098221            | 0.513723851            | 1.702504764                 |
| FASLG  | 1.097755994            | 1.749168762            | 1.275375575                 |
| TLR2   | 2.306625414            | 0.344836139            | 1.230946844                 |
| NFKB2  | 2.400703641            | 0.461591082            | 0.997491011                 |
| NLRP3  | 2.260222485            | 0.331281877            | 1.173990433                 |
| CCL5   | 1.173644228            | 1.593852882            | 0.989870727                 |
| OAS1   | 1.626564919            | 0.915557739            | 1.145489335                 |
| C5AR1  | 1.931984843            | 0.752232095            | 0.561248025                 |

“N/A” values were changed to 0. The z scores of each row were summed, then the summed values were ranked from highest to lowest. A heatmap of the rows containing the top 20 summed values was created using GraphPad Prism version 9.





|                                                                           |   |   |   |   |   |   |   |
|---------------------------------------------------------------------------|---|---|---|---|---|---|---|
| Semaphorin Signaling in Neurons                                           | 0 | 0 | 0 | 0 | 0 | 0 | 0 |
| Role of Cytokines in Mediating Communication between Immune Cells         | 0 | 0 | 0 | 0 | 0 | 0 | 0 |
| FAT10 Signaling Pathway                                                   | 0 | 0 | 0 | 0 | 0 | 0 | 0 |
| Alanine Degradation III                                                   | 0 | 0 | 0 | 0 | 0 | 0 | 0 |
| Antigen Presentation Pathway                                              | 0 | 0 | 0 | 0 | 0 | 0 | 0 |
| Ketogenesis                                                               | 0 | 0 | 0 | 0 | 0 | 0 | 0 |
| G Protein Signaling Mediated by Tubby                                     | 0 | 0 | 0 | 0 | 0 | 0 | 0 |
| MSP-RON Signaling Pathway                                                 | 0 | 0 | 0 | 0 | 0 | 0 | 0 |
| Protein Ubiquitination Pathway                                            | 0 | 0 | 0 | 0 | 0 | 0 | 0 |
| Airway Pathology in Chronic Obstructive Pulmonary Disease                 | 0 | 0 | 0 | 0 | 0 | 0 | 0 |
| Dopamine Receptor Signaling                                               | 0 | 0 | 0 | 0 | 0 | 0 | 0 |
| Cathrin-mediated Endocytosis Signaling                                    | 0 | 0 | 0 | 0 | 0 | 0 | 0 |
| Role of JAK1 and JAK2 in $\gamma$ c Cytokine Signaling                    | 0 | 0 | 0 | 0 | 0 | 0 | 0 |
| Communication between Innate and Adaptive Immune Cells                    | 0 | 0 | 0 | 0 | 0 | 0 | 0 |
| Primary Immunodeficiency Signaling                                        | 0 | 0 | 0 | 0 | 0 | 0 | 0 |
| Prostate Cancer Signaling                                                 | 0 | 0 | 0 | 0 | 0 | 0 | 0 |
| B Cell Development                                                        | 0 | 0 | 0 | 0 | 0 | 0 | 0 |
| FAK Signaling                                                             | 0 | 0 | 0 | 0 | 0 | 0 | 0 |
| Xenobiotic Metabolism Signaling                                           | 0 | 0 | 0 | 0 | 0 | 0 | 0 |
| Ceramide Degradation                                                      | 0 | 0 | 0 | 0 | 0 | 0 | 0 |
| IL-17A Signaling in Fibroblasts                                           | 0 | 0 | 0 | 0 | 0 | 0 | 0 |
| Salvage Pathways of Pyrimidine Deoxyribonucleotides                       | 0 | 0 | 0 | 0 | 0 | 0 | 0 |
| GABA Receptor Signaling                                                   | 0 | 0 | 0 | 0 | 0 | 0 | 0 |
| $\beta$ -alanine Degradation I                                            | 0 | 0 | 0 | 0 | 0 | 0 | 0 |
| Pathogenesis of Multiple Sclerosis                                        | 0 | 0 | 0 | 0 | 0 | 0 | 0 |
| G-Protein Coupled Receptor Signaling                                      | 0 | 0 | 0 | 0 | 0 | 0 | 0 |
| Polyamine Regulation in Colon Cancer                                      | 0 | 0 | 0 | 0 | 0 | 0 | 0 |
| Sphingosine and Sphingosine-1-phosphate Metabolism                        | 0 | 0 | 0 | 0 | 0 | 0 | 0 |
| Caveolar-mediated Endocytosis Signaling                                   | 0 | 0 | 0 | 0 | 0 | 0 | 0 |
| IL-12 Signaling and Production in Macrophages                             | 0 | 0 | 0 | 0 | 0 | 0 | 0 |
| Hepatic Fibrosis / Hepatic Stellate Cell Activation                       | 0 | 0 | 0 | 0 | 0 | 0 | 0 |
| Gap Junction Signaling                                                    | 0 | 0 | 0 | 0 | 0 | 0 | 0 |
| Germ Cell-Sertoli Cell Junction Signaling                                 | 0 | 0 | 0 | 0 | 0 | 0 | 0 |
| Methylglyoxal Degradation I                                               | 0 | 0 | 0 | 0 | 0 | 0 | 0 |
| Human Embryonic Stem Cell Pluripotency                                    | 0 | 0 | 0 | 0 | 0 | 0 | 0 |
| Glutathione Redox Reactions I                                             | 0 | 0 | 0 | 0 | 0 | 0 | 0 |
| Tight Junction Signaling                                                  | 0 | 0 | 0 | 0 | 0 | 0 | 0 |
| Citrulline Degradation                                                    | 0 | 0 | 0 | 0 | 0 | 0 | 0 |
| Zmosterol Biosynthesis                                                    | 0 | 0 | 0 | 0 | 0 | 0 | 0 |
| nNOS Signaling in Neurons                                                 | 0 | 0 | 0 | 0 | 0 | 0 | 0 |
| Atherosclerosis Signaling                                                 | 0 | 0 | 0 | 0 | 0 | 0 | 0 |
| Circadian Rhythm Signaling                                                | 0 | 0 | 0 | 0 | 0 | 0 | 0 |
| Serotonin Receptor Signaling                                              | 0 | 0 | 0 | 0 | 0 | 0 | 0 |
| Phagosome Maturation                                                      | 0 | 0 | 0 | 0 | 0 | 0 | 0 |
| Role of OCT4 in Mammalian Embryonic Stem Cell Pluripotency                | 0 | 0 | 0 | 0 | 0 | 0 | 0 |
| Ketolysis                                                                 | 0 | 0 | 0 | 0 | 0 | 0 | 0 |
| Role of MAPK Signaling in the Pathogenesis of Influenza                   | 0 | 0 | 0 | 0 | 0 | 0 | 0 |
| GDP-L-fucose Biosynthesis I (from GDP-D-mannose)                          | 0 | 0 | 0 | 0 | 0 | 0 | 0 |
| Inositol Pyrophosphates Biosynthesis                                      | 0 | 0 | 0 | 0 | 0 | 0 | 0 |
| Palmitate Biosynthesis I (Animals)                                        | 0 | 0 | 0 | 0 | 0 | 0 | 0 |
| Axonal Guidance Signaling                                                 | 0 | 0 | 0 | 0 | 0 | 0 | 0 |
| Cysteine Biosynthesis/Homocysteine Degradation                            | 0 | 0 | 0 | 0 | 0 | 0 | 0 |
| Oxidative Ethanol Degradation III                                         | 0 | 0 | 0 | 0 | 0 | 0 | 0 |
| IL-4 Signaling                                                            | 0 | 0 | 0 | 0 | 0 | 0 | 0 |
| Growth Hormone Signaling                                                  | 0 | 0 | 0 | 0 | 0 | 0 | 0 |
| Citrulline-Nitric Oxide Cycle                                             | 0 | 0 | 0 | 0 | 0 | 0 | 0 |
| Tryptophan Degradation to 2-amino-3-carboxymuconate Semialdehyde          | 0 | 0 | 0 | 0 | 0 | 0 | 0 |
| Role of Osteoblasts, Osteoclasts and Chondrocytes in Rheumatoid Arthritis | 0 | 0 | 0 | 0 | 0 | 0 | 0 |
| Oleate Biosynthesis II (Animals)                                          | 0 | 0 | 0 | 0 | 0 | 0 | 0 |
| Melatonin Degradation II                                                  | 0 | 0 | 0 | 0 | 0 | 0 | 0 |
| Role of Tissue Factor in Cancer                                           | 0 | 0 | 0 | 0 | 0 | 0 | 0 |
| IL-10 Signaling                                                           | 0 | 0 | 0 | 0 | 0 | 0 | 0 |
| Th1 and Th2 Activation Pathway                                            | 0 | 0 | 0 | 0 | 0 | 0 | 0 |
| Cellular Effects of Sildenafil (Viagra)                                   | 0 | 0 | 0 | 0 | 0 | 0 | 0 |
| Role of JAK2 in Hormone-like Cytokine Signaling                           | 0 | 0 | 0 | 0 | 0 | 0 | 0 |
| Alanine Biosynthesis II                                                   | 0 | 0 | 0 | 0 | 0 | 0 | 0 |
| Adipogenesis pathway                                                      | 0 | 0 | 0 | 0 | 0 | 0 | 0 |
| Chronic Myeloid Leukemia Signaling                                        | 0 | 0 | 0 | 0 | 0 | 0 | 0 |
| Granulocyte Adhesion and Diapedesis                                       | 0 | 0 | 0 | 0 | 0 | 0 | 0 |
| FXR/RXR Activation                                                        | 0 | 0 | 0 | 0 | 0 | 0 | 0 |
| Glucocorticoid Receptor Signaling                                         | 0 | 0 | 0 | 0 | 0 | 0 | 0 |
| Role of IL-17A in Arthritis                                               | 0 | 0 | 0 | 0 | 0 | 0 | 0 |
| Acetyl-CoA Biosynthesis I (Pyruvate Dehydrogenase Complex)                | 0 | 0 | 0 | 0 | 0 | 0 | 0 |
| Extrinsic Prothrombin Activation Pathway                                  | 0 | 0 | 0 | 0 | 0 | 0 | 0 |
| Iron homeostasis signaling pathway                                        | 0 | 0 | 0 | 0 | 0 | 0 | 0 |
| NAD biosynthesis II (from tryptophan)                                     | 0 | 0 | 0 | 0 | 0 | 0 | 0 |
| RAR Activation                                                            | 0 | 0 | 0 | 0 | 0 | 0 | 0 |
| Molecular Mechanisms of Cancer                                            | 0 | 0 | 0 | 0 | 0 | 0 | 0 |
| Isoleucine Degradation I                                                  | 0 | 0 | 0 | 0 | 0 | 0 | 0 |
| Virus Entry via Endocytic Pathways                                        | 0 | 0 | 0 | 0 | 0 | 0 | 0 |
| Spermidine Biosynthesis I                                                 | 0 | 0 | 0 | 0 | 0 | 0 | 0 |
| Parkinson's Signaling                                                     | 0 | 0 | 0 | 0 | 0 | 0 | 0 |
| FXR/RXR Activation                                                        | 0 | 0 | 0 | 0 | 0 | 0 | 0 |
| Maturity Onset Diabetes of Young (MODY) Signaling                         | 0 | 0 | 0 | 0 | 0 | 0 | 0 |
| Remodeling of Epithelial Adherens Junctions                               | 0 | 0 | 0 | 0 | 0 | 0 | 0 |
| Role of JAK family kinases in IL-6-type Cytokine Signaling                | 0 | 0 | 0 | 0 | 0 | 0 | 0 |
| Apelin Muscle Signaling Pathway                                           | 0 | 0 | 0 | 0 | 0 | 0 | 0 |

|                                                                              | CT-2A Vehicle vs. D2C7 | CT-2A Vehicle vs. CD40 | CT-2A-Vehicle vs. Combo | CD31   | CD4   | CD8    | MΦ    |
|------------------------------------------------------------------------------|------------------------|------------------------|-------------------------|--------|-------|--------|-------|
| Systemic Lupus Erythematosus In B Cell Signaling Pathway                     | 6.194                  | 2.121                  | 2.4                     | 0.775  | 0     | -0.632 | 1.732 |
| Crosstalk between Dendritic Cells and Natural Killer Cells                   | 4.583                  | 2.646                  | 2.828                   | -0.816 | 0     | 0      | 2.646 |
| Role of Hypercytokinemia/hyperchemokine in the Pathogenesis of Influenza     | 5.831                  | 0                      | 3.606                   | 0      | 0     | 0      | 0     |
| Neuroinflammation Signaling Pathway                                          | 5.821                  | 0.816                  | 1.886                   | 0.277  | 1.134 | -0.302 | 1.604 |
| Necroptosis Signaling Pathway                                                | 3.307                  | 2.449                  | 2.333                   | 0      | 0     | 0      | 0.816 |
| Acute Phase Response Signaling                                               | 5.286                  | 1.633                  | 1.155                   | 0      | 0     | 0      | 0     |
| Production of Nitric Oxide and Reactive Oxygen Species in Macrophages        | 4.16                   | 1.667                  | 1.732                   | 0      | 0     | 0.707  | 1     |
| IL-15 Production                                                             | 3.286                  | 1.89                   | 2.333                   | -0.816 | -1    | 0      | 0     |
| Phagosome Formation                                                          | 5.883                  | 3                      | -1.622                  | -1.667 | -2.84 | -1.886 | 0.378 |
| IL-17 Signaling                                                              | 4.522                  | 1.414                  | 1                       | 1.134  | 0     | 0      | 0     |
| TREM1 Signaling                                                              | 4.707                  | 0                      | 1.633                   | 0      | 0     | 2      | 0     |
| Role of PKR in Interferon Induction and Antiviral Response                   | 3.683                  | 0                      | 2.333                   | 0      | 0     | 1      | 0     |
| Th17 Activation Pathway                                                      | 3.9                    | 0                      | 2                       | 1.633  | 2.236 | 0.707  | 0     |
| T Cell Exhaustion Signaling Pathway                                          | 2.236                  | 1                      | 2.53                    | 0.905  | 0     | 0.707  | 0.816 |
| Interferon Signaling                                                         | 2.84                   | 0                      | 2.828                   | 0      | 0     | 0      | 0     |
| Role of Pattern Recognition Receptors in Recognition of Bacteria and Viruses | 3.413                  | 0                      | 2.236                   | 0      | 0     | -1.342 | 0     |
| Xenobiotic Metabolism AHR Signaling Pathway                                  | 2.5                    | 1.633                  | 1.342                   | 0      | 0     | -1.342 | 0     |
| Tumor Microenvironment Pathway                                               | 5.091                  | 0.577                  | -0.426                  | 0.302  | 0.816 | 1.414  | 0.632 |
| Th1 Pathway                                                                  | 3.674                  | 0                      | 1.508                   | 1.069  | 0     | 0      | 1     |
| Natural Killer Cell Signaling                                                | 3.781                  | 1                      | 0                       | 0.5    | 0     | 1.134  | 0     |

"N/A" values were changed to 0. The z scores of each row were summed, then the summed values were ranked from highest to lowest. A heatmap of the rows containing the top 20 summed values was created using GraphPad Prism version 9.

© 2000-2021 QIAGEN. All rights reserved.

| Upstream Regulators | CT-2A Vehicle Vs. D2C7-Day 9 - | CT-2A Vehicle Vs. CD40 Day 9-P | CT-2A-Vehicle Vs. D2C7+CD40 Day 9 P |
|---------------------|--------------------------------|--------------------------------|-------------------------------------|
|                     | 2021-08-27 01:54 PM            | 0.05 - 2021-08-27 01:49 PM     | 0.05 - 2021-08-27 01:58 PM          |
| IL1RN               | -5.638                         | 0                              | -3.988                              |
| SCGB1A1             | -2.489                         | -1.98                          | -1.987                              |
| IL37                | -3.601                         | 0                              | -2.373                              |
| IL1B                | 11.147                         | 2.597                          | 5.993                               |
| IFNG                | 12.764                         | 2.748                          | 7.555                               |
| TNF                 | 13.219                         | 3.069                          | 6.297                               |
| Interferon alpha    | 8.851                          | 2.132                          | 6.174                               |
| IFNL1               | 6.439                          | 0                              | 4.595                               |
| IL33                | 6.689                          | 1.155                          | 3.061                               |
| TNFSF11             | 7.1                            | 2.144                          | 2.71                                |
| CSF2                | 7.512                          | 2.419                          | 2.464                               |
| OSM                 | 8.699                          | 2.071                          | 3.808                               |
| IL1A                | 8.099                          | 1.527                          | 4.13                                |
| IFNA2               | 6.879                          | 2.276                          | 4.854                               |
| CD40LG              | 6.399                          | 2.257                          | 4.144                               |
| Tnf (family)        | 6.72                           | 1.825                          | 3.781                               |
| IL6                 | 8.312                          | 3.021                          | 3.483                               |
| IL2                 | 7.633                          | 3.68                           | 3.827                               |
| IL1                 | 7.185                          | 3.016                          | 4.154                               |
| cytokine            | 6.709                          | 3.218                          | 4.087                               |
| CSF1                | 3.89                           | -3.048                         | -0.7                                |
| IL4                 | 5.445                          | 1.24                           | 0.064                               |
| EDN1                | 5.365                          | 1.969                          | 0.823                               |
| IL5                 | 6.737                          | 0                              | 0.662                               |
| PRL                 | 5.831                          | 0                              | 0.976                               |
| IFNB1               | 5.137                          | 2.87                           | 5.032                               |
| IL23A               | 3.537                          | 1.964                          | 2.759                               |
| PF4                 | 3.424                          | 2.433                          | 3.08                                |
| IL12B               | 3.609                          | 1.437                          | 2.516                               |
| IL13                | 4.638                          | 1.81                           | 2.522                               |
| IL12 (family)       | 4.061                          | 1.767                          | 2.552                               |
| IL22                | 4.234                          | 1.959                          | 2.946                               |
| IL21                | 4.961                          | 3.311                          | 3.343                               |
| IFNA4               | 4.677                          | 2.433                          | 3.729                               |
| IL17A               | 6.502                          | 2.46                           | 3.006                               |
| CSF                 | 5.657                          | 2.449                          | 3                                   |
| TNFSF12             | 5.882                          | 2.414                          | 3.73                                |
| MIF                 | 4.576                          | 1.195                          | 2.951                               |
| IL12 (complex)      | 5.041                          | 1.33                           | 3.116                               |
| IL18                | 5.499                          | 1.599                          | 3.989                               |
| IFN alpha/beta      | 5.146                          | 1.824                          | 3.25                                |
| Ifn                 | 5.833                          | 1.706                          | 3.254                               |
| IL3                 | 4.959                          | 0.063                          | 1.941                               |
| CXCL12              | 4.705                          | 0                              | 1.278                               |
| IL27                | 4.258                          | 0.032                          | 2.346                               |
| IL36A               | 4.049                          | 0                              | 2.807                               |
| IFNE                | 4.111                          | 0                              | 3                                   |
| IFN type 1          | 4.043                          | 0                              | 2.979                               |
| IFNA1/IFNA13        | 4.573                          | 0                              | 3.506                               |
| IFN Beta            | 5.586                          | 0                              | 3.385                               |
| Ifn gamma           | 5.174                          | 0                              | 3.527                               |
| IL15                | 5.081                          | 0.041                          | 3.199                               |
| EBI3                | 2.212                          | 1.067                          | 2.465                               |
| THPO                | 2.64                           | 1.455                          | 2.602                               |
| IL12A               | 2.815                          | 0.966                          | 2.607                               |

|                           |        |        |        |
|---------------------------|--------|--------|--------|
| IL7                       | 3.75   | 2.006  | 1.722  |
| IL24                      | 3.133  | 1.159  | 1.182  |
| CCL11                     | 3.27   | 1.117  | 1.556  |
| Pro-inflammatory Cytokine | 3.221  | 1.016  | 1.813  |
| C5                        | 3.77   | 0      | 1.452  |
| CCL5                      | 3.786  | 0      | 1.858  |
| IL32                      | 3.094  | 0      | 1.656  |
| TNFSF15                   | 2.941  | 0      | 1.539  |
| CXCL1                     | 2.804  | 0      | 2      |
| TNFSF14                   | 2.923  | 0      | 1.904  |
| IL17C                     | 2.618  | 0      | 2.227  |
| CCL3                      | 2.293  | 0      | 1.974  |
| FLT3LG                    | 2.493  | 0      | 1.987  |
| IL36B                     | 2.412  | 0      | 1.981  |
| TNFSF10                   | 3.377  | 0.633  | 2.623  |
| Ccl2                      | 3.753  | 0      | 2.337  |
| IFNL3                     | 3.653  | 0      | 2.577  |
| LTA                       | 3.499  | 0      | 2.353  |
| TSLP                      | 3.361  | 0      | 2.397  |
| NAMPT                     | 3.398  | 0      | 2.385  |
| Lymphotoxin               | 2.97   | 0      | 2.425  |
| IL17F                     | 3.221  | 0      | 2.15   |
| IFNK                      | 3.162  | 0      | 2.236  |
| CXCL2                     | 3.067  | 0      | 2.209  |
| CXCL3                     | 3.112  | 0      | 2.19   |
| IL10                      | -0.318 | 0.538  | -3.364 |
| CCL22                     | -2.211 | 0      | 0      |
| WNT5A                     | -0.559 | -0.173 | -1.482 |
| CXCL5                     | 0      | 0      | -1.225 |
| IFN Lambda                | 0.854  | 0      | 0      |
| IL25                      | 0.604  | 0      | 0.168  |
| TIMP1                     | 0.508  | 0      | 0      |
| CTF1                      | 0.61   | 0      | 0      |
| CXCL8                     | 1.647  | 1.949  | -0.271 |
| WNT1                      | 1.884  | 0      | -1.949 |
| EPO                       | 2.949  | -1.439 | -0.575 |
| Growth hormone            | 2.357  | -1.414 | -0.504 |
| CSF3                      | 4.072  | 0.023  | -1.016 |
| IFNL4                     | 3.141  | 0      | 0      |
| TNFSF13B                  | 3.713  | 0      | 0      |
| LIF                       | 3.755  | 0      | -0.102 |
| IL9                       | 1.618  | -1.131 | 0.981  |
| IL23                      | 2.198  | 0      | 0.842  |
| CCL2                      | 2.423  | 0      | 1.136  |
| CXCL10                    | 2.124  | 0      | 1.524  |
| TNFSF9                    | 2.155  | 0      | 1.342  |
| FASLG                     | 1.27   | 0.762  | 1.171  |
| CX3CL1                    | 1.509  | 0.651  | 0.498  |
| CCL3L3                    | 1.325  | 0      | 0.985  |
| CCL4                      | 0.767  | 0      | 1.199  |
| IL11                      | 1.433  | 0      | -0.647 |
| WNT3A                     | 1.973  | 0.079  | -0.726 |
| CRH                       | 1.969  | 0.123  | -0.451 |
| SPP1                      | 2.375  | 0.548  | 0.319  |
| Il3                       | 1.733  | 0      | 0      |
| MAC                       | 1.948  | 0      | 0.063  |
| CXCL6                     | 1.923  | 0      | 0      |
| Endothelin                | 1.914  | 0      | 0      |

|                        |       |   |   |
|------------------------|-------|---|---|
| CNTF                   | 2     | 0 | 0 |
| Ccl6                   | 1.982 | 0 | 0 |
| IL26                   | 1.969 | 0 | 0 |
| IL17B                  | 1.96  | 0 | 0 |
| AIMP1                  | 2.392 | 0 | 0 |
| IFNW1                  | 2.449 | 0 | 0 |
| IL19                   | 2.412 | 0 | 0 |
| IL17a dimer            | 2.423 | 0 | 0 |
| Ifnz (includes others) | 2.433 | 0 | 0 |
| IL-17f dimer           | 2.219 | 0 | 0 |
| IL36G                  | 2.183 | 0 | 0 |
| TNFSF4                 | 2.191 | 0 | 0 |
| IFNA21                 | 2.193 | 0 | 0 |
| IFNA6                  | 2.197 | 0 | 0 |
| IFNA8                  | 2.197 | 0 | 0 |
| IFNA16                 | 2.197 | 0 | 0 |
| IFNA10                 | 2.197 | 0 | 0 |
| IFNA14                 | 2.197 | 0 | 0 |
| IFNA7                  | 2.197 | 0 | 0 |
| IFNA5                  | 2.197 | 0 | 0 |
| CLCF1                  | 0     | 0 | 0 |
| TH1 Cytokine           | 0     | 0 | 0 |
| XCL1                   | 0     | 0 | 0 |
| CMTM6                  | 0     | 0 | 0 |
| SOCS5                  | 0     | 0 | 0 |
| PTK                    | 0     | 0 | 0 |
| CCL18                  | 0     | 0 | 0 |
| CMTM4                  | 0     | 0 | 0 |
| DKK3                   | 0     | 0 | 0 |
| CCL1                   | 0     | 0 | 0 |
| LTB                    | 0     | 0 | 0 |
| FAM3B                  | 0     | 0 | 0 |
| IL16                   | 0     | 0 | 0 |
| VAV3                   | 0     | 0 | 0 |
| CCL7                   | 0     | 0 | 0 |
| IFNA17                 | 0     | 0 | 0 |
| CCL17                  | 0     | 0 | 0 |
| CD70                   | 0     | 0 | 0 |
| CCL15                  | 0     | 0 | 0 |
| CXCL9                  | 0     | 0 | 0 |
| TH2 Cytokine           | 0     | 0 | 0 |
| Eotaxin                | 0     | 0 | 0 |
| CCL20                  | 0     | 0 | 0 |
| TH17 Cytokine          | 0     | 0 | 0 |
| PPBP                   | 0     | 0 | 0 |
| CXCL17                 | 0     | 0 | 0 |
| CCL19                  | 0     | 0 | 0 |



|               | CT-2A Vehicle Vs. D2C7 | CT-2A Vehicle Vs. CD40 | CT-2A-Vehicle Vs. D2C7+CD40 |
|---------------|------------------------|------------------------|-----------------------------|
| IFN-g         | 12.764                 | 2.748                  | 7.555                       |
| TNF- $\alpha$ | 13.219                 | 3.069                  | 6.297                       |
| IL-1b         | 11.147                 | 2.597                  | 5.993                       |
| IL-2          | 7.633                  | 3.68                   | 3.827                       |
| IL-6          | 8.312                  | 3.021                  | 3.483                       |
| GM-CSF        | 7.512                  | 2.419                  | 2.464                       |
| IL-17A        | 6.502                  | 2.46                   | 3.006                       |
| IL-21         | 4.961                  | 3.311                  | 3.343                       |
| IL-18         | 5.499                  | 1.599                  | 3.989                       |
| IL-12p70      | 5.041                  | 1.33                   | 3.116                       |
| IL-13         | 4.638                  | 1.81                   | 2.522                       |
| IL-15         | 5.081                  | 0.041                  | 3.199                       |
| IL-7          | 3.75                   | 2.006                  | 1.722                       |
| IL-5          | 6.737                  | 0                      | 0.662                       |
| IL-4          | 5.445                  | 1.24                   | 0.064                       |
| IL-27         | 4.258                  | 0.032                  | 2.346                       |
| MCP-1         | 3.753                  | 0                      | 2.337                       |
| CCL-11        | 3.27                   | 1.117                  | 1.556                       |
| RANTES        | 3.786                  | 0                      | 1.858                       |
| KC            | 2.804                  | 0                      | 2                           |
| MIP-1a        | 2.293                  | 0                      | 1.974                       |
| IP-10         | 2.124                  | 0                      | 1.524                       |

“N/A” values were changed to 0. The z scores of each row were summed, then the summed values were ranked from highest to lowest. A heatmap of the rows containing the top 22 summed values was created using GraphPad Prism version 9.
