# Supplementary material
Source: PubMed Central journal article supplement (PMC10440725)
Supplement: NIHMS1923415-supplement-Table_S2_.pdf [file NIHMS1923415-supplement-Table_S2_.pdf]

|                                                                                                       | CT-2A Vehicle Vs. D2C7 Day 12 P 0.05 FC<br>1.5 - 2021-08-27 02:05 PM | CT-2A Vehicle Vs. CD40 Day 12 P<br>0.05- 2021-08-27 02:01 PM | CT-2A Vehicle Vs. D2C7+CD40 Day 12 p<br>0.05 FC 1.5 - 2021-08-27 02:08 PM |
|-------------------------------------------------------------------------------------------------------|----------------------------------------------------------------------|--------------------------------------------------------------|---------------------------------------------------------------------------|
| Canonical Pathways                                                                                    |                                                                      |                                                              |                                                                           |
| Cell Cycle Control of Chromosomal Replication                                                         | -5.099                                                               | 0                                                            | -5.099                                                                    |
| Coronavirus Pathogenesis Pathway                                                                      | 3.413                                                                | 0                                                            | 2.294                                                                     |
| MSP-RON Signaling In Macrophages Pathway                                                              | 2.673                                                                | -2                                                           | -0.816                                                                    |
| PD-1, PD-L1 cancer immunotherapy pathway                                                              | 1.964                                                                | -2                                                           | 0.378                                                                     |
| Th1 Pathway                                                                                           | -2.711                                                               | 2                                                            | 1.633                                                                     |
| Phagosome Formation                                                                                   | -3.108                                                               | 3.606                                                        | -2.188                                                                    |
| B Cell Receptor Signaling                                                                             | -0.707                                                               | 2                                                            | -1.89                                                                     |
| Systemic Lupus Erythematosus In B Cell Signaling Pathway                                              | -2.401                                                               | 2.333                                                        | -0.894                                                                    |
| Breast Cancer Regulation by Stathmin1                                                                 | -1.778                                                               | 2.236                                                        | -1.82                                                                     |
| IL-7 Signaling Pathway                                                                                | -2.309                                                               | 2.236                                                        | -2.121                                                                    |
| HOTAIR Regulatory Pathway                                                                             | -2.556                                                               | 0                                                            | -3.9                                                                      |
| BEX2 Signaling Pathway                                                                                | -3.051                                                               | 0                                                            | -3.873                                                                    |
| Osteoarthritis Pathway                                                                                | -3.53                                                                | 0                                                            | -4.2                                                                      |
| Kinetochore Metaphase Signaling Pathway                                                               | -3.536                                                               | 0                                                            | -3.536                                                                    |
| MSP-RON Signaling In Cancer Cells Pathway                                                             | -2.84                                                                | 0                                                            | -3.441                                                                    |
| Estrogen-mediated S-phase Entry                                                                       | -3.051                                                               | 0                                                            | -3.207                                                                    |
| NER (Nucleotide Excision Repair, Enhanced Pathway)                                                    | -3.162                                                               | 0                                                            | -3.162                                                                    |
| Hepatic Fibrosis Signaling Pathway                                                                    | -3.212                                                               | 0                                                            | -3.124                                                                    |
| Regulation Of The Epithelial Mesenchymal Transition By Growth Factors Pathway                         | -2.828                                                               | 0                                                            | -2.683                                                                    |
| PI3K/AKT Signaling                                                                                    | -2.646                                                               | 0                                                            | -2.646                                                                    |
| BER (Base Excision Repair) Pathway                                                                    | -2.828                                                               | 0                                                            | -3.162                                                                    |
| Pyridoxal 5'-phosphate Salvage Pathway                                                                | -2.828                                                               | 0                                                            | -2.828                                                                    |
| Colorectal Cancer Metastasis Signaling                                                                | -2.744                                                               | 0                                                            | -2.921                                                                    |
| GP6 Signaling Pathway                                                                                 | -2.828                                                               | 0                                                            | -2.982                                                                    |
| Factors Promoting Cardiogenesis in Vertebrates                                                        | -1.387                                                               | 0                                                            | -2.84                                                                     |
| Retinoic acid Mediated Apoptosis Signaling                                                            | -3.317                                                               | 0                                                            | -2                                                                        |
| Necroptosis Signaling Pathway                                                                         | -2.683                                                               | 0                                                            | -1.265                                                                    |
| IL-15 Production                                                                                      | -2.985                                                               | 0                                                            | -1.291                                                                    |
| Role of PKR in Interferon Induction and Antiviral Response                                            | -2.5                                                                 | 0                                                            | -1.508                                                                    |
| Leukocyte Extravasation Signaling                                                                     | -2.5                                                                 | 0                                                            | -2.111                                                                    |
| p38 MAPK Signaling                                                                                    | -2.53                                                                | 0                                                            | -1.897                                                                    |
| Salvage Pathways of Pyrimidine Ribonucleotides                                                        | -2.496                                                               | 0                                                            | -1.732                                                                    |
| Agrin Interactions at Neuromuscular Junction                                                          | -2                                                                   | 0                                                            | -2                                                                        |
| Tumor Microenvironment Pathway                                                                        | -2.117                                                               | 0                                                            | -2.294                                                                    |
| PAK Signaling                                                                                         | -2.121                                                               | 0                                                            | -2.333                                                                    |
| Cardiac Hypertrophy Signaling (Enhanced)                                                              | -2.412                                                               | 0                                                            | -2.694                                                                    |
| Mitotic Roles of Polo-Like Kinase                                                                     | -2.309                                                               | 0                                                            | -2.496                                                                    |
| Cyclins and Cell Cycle Regulation                                                                     | -2.357                                                               | 0                                                            | -2.357                                                                    |
| Small Cell Lung Cancer Signaling                                                                      | -2.449                                                               | 0                                                            | -2.449                                                                    |
| Neuroinflammation Signaling Pathway                                                                   | -2.722                                                               | 0.816                                                        | -0.6                                                                      |
| Role of Hypercytokinemia/hyperchemokine in the Pathogenesis of Influenza                              | -3.545                                                               | 0                                                            | -0.333                                                                    |
| Interferon Signaling                                                                                  | -3.051                                                               | 0                                                            | -0.447                                                                    |
| Crosstalk between Dendritic Cells and Natural Killer Cells                                            | -3                                                                   | 0                                                            | 0                                                                         |
| Inhibition of Angiogenesis by TSP1                                                                    | 0                                                                    | 0                                                            | -2                                                                        |
| Tumoricidal Function of Hepatic Natural Killer Cells                                                  | 0                                                                    | 0                                                            | -2                                                                        |
| PI3K Signaling in B Lymphocytes                                                                       | -1.414                                                               | 0                                                            | -0.447                                                                    |
| Activation of IRF by Cytosolic Pattern Recognition Receptors                                          | -1.508                                                               | 0                                                            | 0                                                                         |
| Role of IL-17F in Allergic Inflammatory Airway Diseases                                               | -1.342                                                               | 0                                                            | 0                                                                         |
| VDR/RXR Activation                                                                                    | -1.134                                                               | 0                                                            | 0                                                                         |
| Glycine Betaine Degradation                                                                           | -1                                                                   | 0                                                            | 0                                                                         |
| iNOS Signaling                                                                                        | -1                                                                   | 0                                                            | 0                                                                         |
| Role of Pattern Recognition Receptors in Recognition of Bacteria and Viruses                          | -2.121                                                               | 0                                                            | 0                                                                         |
| UVA-induced MAPK Signaling                                                                            | -2                                                                   | 0                                                            | 0                                                                         |
| dTMP De Novo Biosynthesis                                                                             | -2                                                                   | 0                                                            | 0                                                                         |
| IL-15 Signaling                                                                                       | -2.236                                                               | 0                                                            | -1                                                                        |
| HER-2 Signaling in Breast Cancer                                                                      | -2.4                                                                 | 0                                                            | -0.894                                                                    |
| TREM1 Signaling                                                                                       | -2                                                                   | 0                                                            | -0.632                                                                    |
| eNOS Signaling                                                                                        | -1.897                                                               | 0                                                            | -0.5                                                                      |
| Neuroprotective Role of THOP1 in Alzheimer's Disease                                                  | -1.414                                                               | -1                                                           | -1                                                                        |
| WNT/β-catenin Signaling                                                                               | -0.471                                                               | 0                                                            | -1.342                                                                    |
| STAT3 Pathway                                                                                         | -0.816                                                               | 0                                                            | -0.707                                                                    |
| ATM Signaling                                                                                         | -0.5                                                                 | 0                                                            | -0.943                                                                    |
| Pyrimidine Deoxyribonucleotides De Novo Biosynthesis I                                                | -1.134                                                               | 0                                                            | -0.816                                                                    |
| Cell Cycle Regulation by BTG Family Proteins                                                          | -1.134                                                               | 0                                                            | -1.134                                                                    |
| Role of BRCA1 in DNA Damage Response                                                                  | -0.894                                                               | 0                                                            | -1.147                                                                    |
| IL-17A Signaling in Gastric Cells                                                                     | -1                                                                   | 0                                                            | -1                                                                        |
| Phospholipases                                                                                        | -1                                                                   | 0                                                            | -1                                                                        |
| Apelin Liver Signaling Pathway                                                                        | -1.342                                                               | 0                                                            | -2.236                                                                    |
| Thyroid Cancer Signaling                                                                              | -0.905                                                               | 0                                                            | -1.604                                                                    |
| Role of MAPK Signaling in Promoting the Pathogenesis of Influenza                                     | -0.816                                                               | 0                                                            | -1.508                                                                    |
| Glioblastoma Multiforme Signaling                                                                     | -1.147                                                               | 0                                                            | -1.886                                                                    |
| Regulation Of The Epithelial Mesenchymal Transition In Development Pathway                            | -1.069                                                               | 0                                                            | -1.941                                                                    |
| Acute Myeloid Leukemia Signaling                                                                      | -1                                                                   | 0                                                            | -1.89                                                                     |
| Melanoma Signaling                                                                                    | -1.342                                                               | 0                                                            | -1.342                                                                    |
| HGF Signaling                                                                                         | -1.265                                                               | 0                                                            | -1.508                                                                    |
| Aryl Hydrocarbon Receptor Signaling                                                                   | -1.279                                                               | 0                                                            | -1.528                                                                    |
| HIF1α Signaling                                                                                       | -1.606                                                               | 0                                                            | -0.943                                                                    |
| Actin Cytoskeleton Signaling                                                                          | -1.604                                                               | 0                                                            | -1.155                                                                    |
| Non-Small Cell Lung Cancer Signaling                                                                  | -1.633                                                               | 0                                                            | -1.342                                                                    |
| p70S6K Signaling                                                                                      | -1.89                                                                | 0                                                            | -1.633                                                                    |
| ILK Signaling                                                                                         | -1.698                                                               | 0                                                            | -1.698                                                                    |
| ERK5 Signaling                                                                                        | -1.633                                                               | 0                                                            | -1.89                                                                     |
| Pancreatic Adenocarcinoma Signaling                                                                   | -1.604                                                               | 0                                                            | -1.941                                                                    |
| PEDF Signaling                                                                                        | -2.121                                                               | 0                                                            | -1.667                                                                    |
| Ovarian Cancer Signaling                                                                              | -1.89                                                                | 0                                                            | -1.134                                                                    |
| Natural Killer Cell Signaling                                                                         | -2.117                                                               | 0                                                            | -1.291                                                                    |
| Th2 Pathway                                                                                           | -1.886                                                               | 0                                                            | -1.414                                                                    |
| Sperm Motility                                                                                        | -1.897                                                               | 0                                                            | -1.414                                                                    |
| Cell Cycle: G1/S Checkpoint Regulation                                                                | 1.604                                                                | 0                                                            | 1.807                                                                     |
| Endocannabinoid Cancer Inhibition Pathway                                                             | 1.886                                                                | 0                                                            | 1.528                                                                     |
| Senescence Pathway                                                                                    | 0.48                                                                 | 0                                                            | 1.406                                                                     |
| Inhibition of Matrix Metalloproteases                                                                 | 1.414                                                                | 0                                                            | 1.134                                                                     |
| Semaphorin Neuronal Repulsive Signaling Pathway                                                       | 0.832                                                                | 0                                                            | 1.069                                                                     |
| Role of IL-17A in Psoriasis                                                                           | 1                                                                    | 0                                                            | 1.342                                                                     |
| Cell Cycle: G2/M DNA Damage Checkpoint Regulation                                                     | 1                                                                    | 0                                                            | 1.213                                                                     |
| IL-17 Signaling                                                                                       | -1.134                                                               | 0                                                            | 0.894                                                                     |
| Differential Regulation of Cytokine Production in Intestinal Epithelial Cells by IL-17A and IL-17F    | -0.707                                                               | 0                                                            | 1.342                                                                     |
| Differential Regulation of Cytokine Production in Macrophages and T Helper Cells by IL-17A and IL-17F | -0.378                                                               | 0                                                            | 1                                                                         |
| FAT10 Cancer Signaling Pathway                                                                        | -0.378                                                               | 0                                                            | 1                                                                         |
| SPINK1 Pancreatic Cancer Pathway                                                                      | -0.447                                                               | 0                                                            | 0.707                                                                     |
| Pyrimidine Ribonucleotides De Novo Biosynthesis                                                       | -0.447                                                               | 0                                                            | 0.447                                                                     |
| Neurotrophin/TRK Signaling                                                                            | 0.816                                                                | 0                                                            | -0.378                                                                    |

|                                                                                |        |   |        |
|--------------------------------------------------------------------------------|--------|---|--------|
| Regulation of Cellular Mechanics by Calpain Protease                           | -0.302 | 0 | -0.632 |
| Intrinsic Prothrombin Activation Pathway                                       | 0      | 0 | -0.816 |
| Role of WNT/GSK-3 $\beta$ Signaling in the Pathogenesis of Influenza           | 0.378  | 0 | -0.816 |
| Basal Cell Carcinoma Signaling                                                 | 0.302  | 0 | -1.155 |
| PCP (Planar Cell Polarity) Pathway                                             | 0.378  | 0 | -1.134 |
| CDK5 Signaling                                                                 | 0.707  | 0 | 0.333  |
| Acute Phase Response Signaling                                                 | 0.302  | 0 | 0.832  |
| Epithelial Adherens Junction Signaling                                         | 0.302  | 0 | 0.535  |
| Role of CHK Proteins in Cell Cycle Checkpoint Control                          | 0.535  | 0 | 0.535  |
| IL-6 Signaling                                                                 | -0.632 | 0 | 0      |
| MIF Regulation of Innate Immunity                                              | -0.378 | 0 | 0      |
| Toll-like Receptor Signaling                                                   | -0.447 | 0 | 0      |
| CSDE1 Signaling Pathway                                                        | 0      | 0 | -0.378 |
| p53 Signaling                                                                  | 0      | 0 | -0.258 |
| Caveolar-mediated Endocytosis Signaling                                        | 0      | 0 | 0      |
| Glucocorticoid Receptor Signaling                                              | 0      | 0 | 0      |
| GADD45 Signaling                                                               | 0      | 0 | 0      |
| Calcium Transport I                                                            | 0      | 0 | 0      |
| Role of Macrophages, Fibroblasts and Endothelial Cells in Rheumatoid Arthritis | 0      | 0 | 0      |
| Folate Polyglutamylation                                                       | 0      | 0 | 0      |
| Chronic Myeloid Leukemia Signaling                                             | 0      | 0 | 0      |
| MSP-RON Signaling Pathway                                                      | 0      | 0 | 0      |
| Acetone Degradation I (to Methylglyoxal)                                       | 0      | 0 | 0      |
| IL-10 Signaling                                                                | 0      | 0 | 0      |
| Tetrapyrrole Biosynthesis II                                                   | 0      | 0 | 0      |
| Axonal Guidance Signaling                                                      | 0      | 0 | 0      |
| Bladder Cancer Signaling                                                       | 0      | 0 | 0      |
| Antigen Presentation Pathway                                                   | 0      | 0 | 0      |
| Superpathway of Serine and Glycine Biosynthesis I                              | 0      | 0 | 0      |
| Th1 and Th2 Activation Pathway                                                 | 0      | 0 | 0      |
| Regulation of the Epithelial-Mesenchymal Transition Pathway                    | 0      | 0 | 0      |
| Hereditary Breast Cancer Signaling                                             | 0      | 0 | 0      |
| Hepatic Fibrosis / Hepatic Stellate Cell Activation                            | 0      | 0 | 0      |
| Granzyme B Signaling                                                           | 0      | 0 | 0      |
| Complement System                                                              | 0      | 0 | 0      |
| Role of p14/p19ARF in Tumor Suppression                                        | 0      | 0 | 0      |
| Phagosome Maturation                                                           | 0      | 0 | 0      |
| Molecular Mechanisms of Cancer                                                 | 0      | 0 | 0      |
| Mismatch Repair in Eukaryotes                                                  | 0      | 0 | 0      |
| DNA Double-Strand Break Repair by Homologous Recombination                     | 0      | 0 | 0      |
| Altered T Cell and B Cell Signaling in Rheumatoid Arthritis                    | 0      | 0 | 0      |
| Glycine Cleavage Complex                                                       | 0      | 0 | 0      |
| Human Embryonic Stem Cell Pluripotency                                         | 0      | 0 | 0      |
| Glutathione-mediated Detoxification                                            | 0      | 0 | 0      |
| Role of Cytokines in Mediating Communication between Immune Cells              | 0      | 0 | 0      |
| Granulocyte Adhesion and Diapedesis                                            | 0      | 0 | 0      |
| Pathogenesis of Multiple Sclerosis                                             | 0      | 0 | 0      |
| Bupropion Degradation                                                          | 0      | 0 | 0      |
| Glycine Biosynthesis I                                                         | 0      | 0 | 0      |
| Role of JAK1 and JAK3 in $\gamma$ c Cytokine Signaling                         | 0      | 0 | 0      |
| IL-4 Signaling                                                                 | 0      | 0 | 0      |
| Airway Pathology in Chronic Obstructive Pulmonary Disease                      | 0      | 0 | 0      |
| Agranulocyte Adhesion and Diapedesis                                           | 0      | 0 | 0      |
| Catecholamine Biosynthesis                                                     | 0      | 0 | 0      |
| Role of Osteoblasts, Osteoclasts and Chondrocytes in Rheumatoid Arthritis      | 0      | 0 | 0      |
| DNA damage-induced 14-3-3 $\sigma$ Signaling                                   | 0      | 0 | 0      |
| Role of NANOG in Mammalian Embryonic Stem Cell Pluripotency                    | 0      | 0 | 0      |
| Role of OCT4 in Mammalian Embryonic Stem Cell Pluripotency                     | 0      | 0 | 0      |
| Role of Tissue Factor in Cancer                                                | 0      | 0 | 0      |
| Coagulation System                                                             | 0      | 0 | 0      |
| Glutathione Redox Reactions I                                                  | 0      | 0 | 0      |
| Sonic Hedgehog Signaling                                                       | 0      | 0 | 0      |
| Atherosclerosis Signaling                                                      | 0      | 0 | 0      |
| Iron homeostasis signaling pathway                                             | 0      | 0 | 0      |
| Folate Transformations I                                                       | 0      | 0 | 0      |
| Hematopoiesis from Multipotent Stem Cells                                      | 0      | 0 | 0      |
| B Cell Development                                                             | 0      | 0 | 0      |
| Communication between Innate and Adaptive Immune Cells                         | 0      | 0 | 0      |
| Fc $\gamma$ R1B Signaling in B Lymphocytes                                     | 0      | 0 | 0      |
| Primary Immunodeficiency Signaling                                             | 0      | 0 | 0      |
| IL-17A Signaling in Fibroblasts                                                | 0      | 0 | 0      |
| Glioma Signaling                                                               | 0      | 0 | 0      |

|                                                                                                       | CT-2A Vehicle Vs. D2C7 | CT-2A Vehicle Vs. CD40 | CT-2A Vehicle Vs. D2C7+CD40 |
|-------------------------------------------------------------------------------------------------------|------------------------|------------------------|-----------------------------|
| Coronavirus Pathogenesis Pathway                                                                      | 3.413                  | 0                      | 2.294                       |
| Endocannabinoid Cancer Inhibition Pathway                                                             | 1.886                  | 0                      | 1.528                       |
| Cell Cycle: G1/S Checkpoint Regulation                                                                | 1.604                  | 0                      | 1.807                       |
| Inhibition of Matrix Metalloproteases                                                                 | 1.414                  | 0                      | 1.134                       |
| Role of IL-17A in Psoriasis                                                                           | 1                      | 0                      | 1.342                       |
| Cell Cycle: G2/M DNA Damage Checkpoint Regulation                                                     | 1                      | 0                      | 1.213                       |
| Semaphorin Neuronal Repulsive Signaling Pathway                                                       | 0.832                  | 0                      | 1.069                       |
| Senescence Pathway                                                                                    | 0.48                   | 0                      | 1.406                       |
| Acute Phase Response Signaling                                                                        | 0.302                  | 0                      | 0.832                       |
| Role of CHK Proteins in Cell Cycle Checkpoint Control                                                 | 0.535                  | 0                      | 0.535                       |
| CDK5 Signaling                                                                                        | 0.707                  | 0                      | 0.333                       |
| Th1 Pathway                                                                                           | -2.711                 | 2                      | 1.633                       |
| Epithelial Adherens Junction Signaling                                                                | 0.302                  | 0                      | 0.535                       |
| Differential Regulation of Cytokine Production in Intestinal Epithelial Cells by IL-17A and IL-17F    | -0.707                 | 0                      | 1.342                       |
| Differential Regulation of Cytokine Production in Macrophages and T Helper Cells by IL-17A and IL-17F | -0.378                 | 0                      | 1                           |
| FAT10 Cancer Signaling Pathway                                                                        | -0.378                 | 0                      | 1                           |
| Neurotrophin/TRK Signaling                                                                            | 0.816                  | 0                      | -0.378                      |
| PD-1, PD-L1 cancer immunotherapy pathway                                                              | 1.964                  | -2                     | 0.378                       |
| SPINK1 Pancreatic Cancer Pathway                                                                      | -0.447                 | 0                      | 0.707                       |
| Pyrimidine Ribonucleotides De Novo Biosynthesis                                                       | -0.447                 | 0                      | 0.447                       |

"N/A" values were changed to 0. The z scores of each row were summed, then the summed values were ranked from highest to lowest. A heatmap of the rows containing the top 20 summed values was created using GraphPad Prism version 9.

© 2000-2021 QIAGEN. All rights reserved.

| Genes in the Inhibition of Matrix Metalloproteases network | CT-2A Vehicle Vs. D2C7 Day 12 P 0.05 FC 1.5 - 2021-08-27 02:05 PM | CT-2A Vehicle Vs. CD40 Day 12 P 0.05- 2021-08-27 02:01 PM | CT-2A Vehicle Vs. D2C7+CD40 Day 12 p 0.05 FC 1.5 - 2021-08-27 02:08 PM |
|------------------------------------------------------------|-------------------------------------------------------------------|-----------------------------------------------------------|------------------------------------------------------------------------|
| MMP3                                                       | 1.832390522                                                       | 0.529567399                                               | 2.04223505                                                             |
| TFPI2                                                      | 1.602753888                                                       | 0                                                         | 1.247015981                                                            |
| MMP25                                                      | -0.092629137                                                      | 1.401897546                                               | 0.485695855                                                            |
| MMP17                                                      | 0.991029693                                                       | 0.209358474                                               | 0.334037636                                                            |
| MMP24                                                      | 0.748174324                                                       | 0.137662912                                               | 0.45839687                                                             |
| TIMP1                                                      | 0.505793467                                                       | -0.655316351                                              | 0.896339202                                                            |
| A2M                                                        | 0.571895367                                                       | -0.307945601                                              | 0.413246942                                                            |
| TIMP4                                                      | -0.016009114                                                      | 0.165030811                                               | 0.277574993                                                            |
| MMP15                                                      | -0.146494638                                                      | -0.045228858                                              | 0.362946022                                                            |
| TIMP2                                                      | -0.130210425                                                      | 0.067297628                                               | 0.142889759                                                            |
| MMP21                                                      | -0.1337567                                                        | 0.226207079                                               | -0.072665804                                                           |
| MMP19                                                      | -0.017714457                                                      | 0.030110663                                               | -0.133859111                                                           |
| ADAM10                                                     | -0.254745255                                                      | -0.079581192                                              | -0.322809269                                                           |
| MMP16                                                      | -0.195211986                                                      | -0.176756847                                              | -0.411612606                                                           |
| ADAM12                                                     | 0.020047573                                                       | -0.212069653                                              | -0.629229064                                                           |
| RECK                                                       | -0.237246799                                                      | -0.257345558                                              | -0.446258535                                                           |
| MMP23B                                                     | -0.345327867                                                      | 0.00830649                                                | -0.756364272                                                           |
| SDC2                                                       | -0.669188534                                                      | -0.31850691                                               | -0.643243134                                                           |
| MMP8                                                       | -0.51216291                                                       | -1.201606159                                              | 0                                                                      |
| ADAM17                                                     | -0.958611696                                                      | -0.089151026                                              | -0.797143276                                                           |
| LRP1                                                       | -0.735371727                                                      | -0.43085335                                               | -0.783911519                                                           |
| MMP9                                                       | -1.560063388                                                      | 0.29083919                                                | -1.338682209                                                           |
| TIMP3                                                      | -1.213651609                                                      | -0.674025032                                              | -1.06985596                                                            |
| MMP2                                                       | -1.805828735                                                      | -0.759647995                                              | -1.28250622                                                            |
| MMP14                                                      | -2.004486309                                                      | -0.36914293                                               | -1.580982194                                                           |
| MMP13                                                      | -1.530672894                                                      | -1.669859849                                              | -0.908303344                                                           |
| MMP28                                                      | -1.59009874                                                       | -0.91755455                                               | -1.608145465                                                           |
| MMP11                                                      | -2.462562821                                                      | -0.792961354                                              | -2.162431542                                                           |
| THBS2                                                      | -2.659334474                                                      | -0.461783663                                              | -2.931302908                                                           |
| MMP12                                                      | -0.747873987                                                      | -2.959751695                                              | -3.10251536                                                            |
| SDC1                                                       | -2.595904077                                                      | -1.044431134                                              | -3.516638212                                                           |
| HSPG2                                                      | -3.918896936                                                      | -0.934699707                                              | -3.392151118                                                           |
| MMP10                                                      | -7.182505387                                                      | -0.576527639                                              | -5.418624825                                                           |

|        | CT-2A Vehicle Vs. D2C7 | CT-2A Vehicle Vs. CD40 | CT-2A Vehicle Vs. D2C7+CD40 |
|--------|------------------------|------------------------|-----------------------------|
| MMP3   | 1.832390522            | 0.529567399            | 2.04223505                  |
| TFPI2  | 1.602753888            | 0                      | 1.247015981                 |
| MMP25  | -0.092629137           | 1.401897546            | 0.485695855                 |
| MMP17  | 0.991029693            | 0.209358474            | 0.334037636                 |
| MMP24  | 0.748174324            | 0.137662912            | 0.45839687                  |
| TIMP1  | 0.505793467            | -0.655316351           | 0.896339202                 |
| A2M    | 0.571895367            | -0.307945601           | 0.413246942                 |
| TIMP4  | -0.016009114           | 0.165030811            | 0.277574993                 |
| MMP15  | -0.146494638           | -0.045228858           | 0.362946022                 |
| TIMP2  | -0.130210425           | 0.067297628            | 0.142889759                 |
| MMP21  | -0.1337567             | 0.226207079            | -0.072665804                |
| MMP19  | -0.017714457           | 0.030110663            | -0.133859111                |
| ADAM10 | -0.254745255           | -0.079581192           | -0.322809269                |
| MMP16  | -0.195211986           | -0.176756847           | -0.411612606                |
| ADAM12 | 0.020047573            | -0.212069653           | -0.629229064                |
| RECK   | -0.237246799           | -0.257345558           | -0.446258535                |
| MMP23B | -0.345327867           | 0.00830649             | -0.756364272                |
| SDC2   | -0.669188534           | -0.31850691            | -0.643243134                |
| MMP8   | -0.51216291            | -1.201606159           | 0                           |
| ADAM17 | -0.958611696           | -0.089151026           | -0.797143276                |

“N/A” values were changed to 0. The z scores of each row were summed, then the summed values were ranked from highest to lowest. A heatmap of the rows containing the top 20 summed values was created using GraphPad Prism version 9.

© 2000-2021 QIAGEN. All rights reserved.

| Genes in the Senescence<br>Pathway network | CT-2A Vehicle Vs. D2C7 Day 12 P 0.05 FC<br>1.5 - 2021-08-27 02:05 PM | CT-2A Vehicle Vs. CD40 Day 12 P<br>0.05- 2021-08-27 02:01 PM | CT-2A Vehicle Vs. D2C7+CD40 Day 12 p<br>0.05 FC 1.5 - 2021-08-27 02:08 PM |
|--------------------------------------------|----------------------------------------------------------------------|--------------------------------------------------------------|---------------------------------------------------------------------------|
| Saa3                                       | 2.304398429                                                          | 2.192418285                                                  | 3.83689231                                                                |
| GADD45B                                    | 3.634460603                                                          | 0.162990449                                                  | 3.681979502                                                               |
| IL6                                        | 2.632672241                                                          | 1.601615073                                                  | 2.283232881                                                               |
| CAPN11                                     | 2.738380934                                                          | 1.687172539                                                  | 1.150424053                                                               |
| CDKN1A                                     | 2.330418832                                                          | 0.092662149                                                  | 1.982073028                                                               |
| RASD1                                      | 1.443070702                                                          | 0.838043739                                                  | 2.02678727                                                                |
| SERPINE1                                   | 2.736227657                                                          | -0.133784215                                                 | 1.081734217                                                               |
| MAPK15                                     | 0.969666329                                                          | 1.118421575                                                  | 1.507875454                                                               |
| ATF3                                       | 1.917661038                                                          | -0.626503269                                                 | 2.076538077                                                               |
| CACNA1F                                    | 1.399390265                                                          | 0.29116678                                                   | 1.597816194                                                               |
| IL1A                                       | 0.883734947                                                          | 0.386092208                                                  | 1.796502767                                                               |
| GADD45G                                    | 1.160469349                                                          | -0.263707309                                                 | 1.59251937                                                                |
| PPP3R2                                     | 0.98273232                                                           | 0                                                            | 1.423174001                                                               |
| SMAD9                                      | 1.059413806                                                          | 0.321706532                                                  | 0.986822708                                                               |
| PIK3R6                                     | 1.020605698                                                          | 0.837835623                                                  | 0.465582298                                                               |
| MAPK4                                      | 0.975245459                                                          | 0.193832407                                                  | 0.935912424                                                               |
| CACNG2                                     | 0.968376438                                                          | 0.251936663                                                  | 0.870067185                                                               |
| BHLHE40                                    | 1.100610002                                                          | 0.200868659                                                  | 0.770851076                                                               |
| PPP2R2C                                    | 1.045785572                                                          | 0.227893879                                                  | 0.555215442                                                               |
| CACNA1A                                    | 0.980544053                                                          | 0.170335441                                                  | 0.670509049                                                               |
| CACNB4                                     | 1.119612885                                                          | 0.115751132                                                  | 0.52817033                                                                |
| CACNA1B                                    | 0.762484141                                                          | 0.315300326                                                  | 0.563235202                                                               |
| CACNA1D                                    | 0.774097172                                                          | 0.277017593                                                  | 0.491604697                                                               |
| ACVR1C                                     | 1.042596263                                                          | 0.123239469                                                  | 0.368661967                                                               |
| PPP2R2B                                    | 0.685706657                                                          | 0.367565375                                                  | 0.480489505                                                               |
| PDK2                                       | 0.705533828                                                          | 0.246725632                                                  | 0.549921323                                                               |
| CACNA1C                                    | 0.581202569                                                          | 0.283818015                                                  | 0.632561719                                                               |
| TGFB2                                      | 0.538535198                                                          | 0.133831991                                                  | 0.81476993                                                                |
| JUN                                        | 0.891693256                                                          | -0.310196928                                                 | 0.872798727                                                               |
| CACNA1E                                    | 0.665586408                                                          | 0.281649786                                                  | 0.477078219                                                               |
| PRKCZ                                      | 0.782226123                                                          | 0.233360552                                                  | 0.38645244                                                                |
| SOD2                                       | 0.60351362                                                           | 0.158583503                                                  | 0.609015627                                                               |
| CACNA2D4                                   | 0.19433733                                                           | 0.290749718                                                  | 0.847516053                                                               |
| CACNB1                                     | 0.710438251                                                          | 0.180327545                                                  | 0.425030229                                                               |
| Calm1 (includes others)                    | 0.651907913                                                          | 0.214764117                                                  | 0.414598919                                                               |
| PIK3R1                                     | 0.764422022                                                          | 0.181022213                                                  | 0.335628496                                                               |
| MRAS                                       | 0.690154181                                                          | 0.144671562                                                  | 0.435705173                                                               |
| RAP2A                                      | 0.682300098                                                          | 0.189243982                                                  | 0.398719982                                                               |
| PDK4                                       | 0.61180077                                                           | 0.409875134                                                  | 0.221812178                                                               |
| FOXO3                                      | 0.615957384                                                          | 0.095662402                                                  | 0.529263442                                                               |
| YPEL3                                      | 0.62266493                                                           | 0.174746822                                                  | 0.358396672                                                               |
| CACNG4                                     | 0.244885628                                                          | 0.33190935                                                   | 0.571974519                                                               |
| PPP3CB                                     | 0.575680695                                                          | 0.181911819                                                  | 0.371455095                                                               |
| PDK1                                       | 0.504172938                                                          | 0.312664389                                                  | 0.302211976                                                               |
| CACNB2                                     | 0.275947159                                                          | 0.253042855                                                  | 0.561984166                                                               |
| BRAF                                       | 0.595918394                                                          | 0.102430734                                                  | 0.385288385                                                               |
| RASSF5                                     | 0.95180547                                                           | 0.073715808                                                  | 0.048476163                                                               |
| PPP3CC                                     | 0.457661522                                                          | 0.308875423                                                  | 0.283946754                                                               |
| PPP3R1                                     | 0.702494088                                                          | 0.064893623                                                  | 0.267973072                                                               |
| ACVR1B                                     | 0.612557661                                                          | 0.148206953                                                  | 0.253578248                                                               |
| PPP3CA                                     | 0.633232787                                                          | 0.074924814                                                  | 0.279847675                                                               |
| PPM1L                                      | 0.669557103                                                          | 0.049133882                                                  | 0.267529972                                                               |
| CAPN3                                      | 0.150195796                                                          | 0.431764145                                                  | 0.390169659                                                               |
| SQSTM1                                     | 0.384112239                                                          | 0.115405966                                                  | 0.469882821                                                               |
| CACNA2D1                                   | 0.462043516                                                          | 0.174393288                                                  | 0.329282905                                                               |
| ETS2                                       | 0.626144616                                                          | 0.040827027                                                  | 0.291421658                                                               |
| CDKN2B                                     | 0.281831202                                                          | 0.256542431                                                  | 0.380655814                                                               |
| MAP2K4                                     | 0.387734744                                                          | 0.159334562                                                  | 0.36632173                                                                |
| CACNG8                                     | 0.486146747                                                          | 0.130741286                                                  | 0.292880648                                                               |
| CACNG3                                     | 0.465669006                                                          | 0.223121958                                                  | 0.185601242                                                               |

|          |              |              |              |
|----------|--------------|--------------|--------------|
| CACNA2D2 | 0.329890835  | 0.076431005  | 0.43679794   |
| CBX7     | 0.285142318  | 0.227892401  | 0.274481403  |
| PPP2R2A  | 0.389367407  | 0.044242303  | 0.338097162  |
| PPP2R1A  | 0.345457666  | 0.105790095  | 0.286574399  |
| PIK3R3   | 0.400808779  | 0.035557274  | 0.273149533  |
| RPS6KA5  | 0.230178813  | 0.323571246  | 0.135156406  |
| MDM2     | 0.407333862  | -8.04E-04    | 0.268809239  |
| RB1      | 0.246968978  | 0.166088153  | 0.258625798  |
| NF1      | 0.28098965   | 0.080477703  | 0.292227025  |
| CAMK4    | 0.628110648  | 0.05031284   | -0.026989554 |
| CACNA2D3 | 0.495783951  | 0.053111156  | 0.091224619  |
| CHP1     | 0.299417503  | 0.126156407  | 0.197437894  |
| PPM1J    | 0.856904024  | 0.123769109  | -0.38269857  |
| ARAF     | 0.084663406  | 0.203806235  | 0.275166967  |
| PDHB     | 0.174360282  | 0.104605766  | 0.243855862  |
| CACNG5   | 0.070176016  | 0.13922015   | 0.293493052  |
| MTOR     | 0.228497056  | 0.0542766    | 0.128498789  |
| RING1    | 0.143045373  | 0.109730456  | 0.155747945  |
| CAPN7    | 0.202947226  | 0.075785999  | 0.107371703  |
| DMTF1    | 0.214863412  | 0.089773929  | 0.079260978  |
| PIK3C3   | 0.161488808  | 0.124112215  | 0.094348579  |
| NFATC2   | 0.116512998  | 0.131418196  | 0.131975891  |
| CACNB3   | 0.241587551  | 0.186262525  | -0.055092492 |
| MAP2K1   | 0.274001695  | 0.08194377   | 0.014540889  |
| PPP2R5B  | 0.227679724  | 0.054861376  | 0.043586962  |
| CACNG7   | 0.247141586  | -0.061851921 | 0.136777314  |
| TGFBR3   | -0.069537938 | 0.252341969  | 0.132617714  |
| BMPR2    | 0.255168516  | -0.069353179 | 0.076196949  |
| MAP2K7   | 0.146462959  | 0.01526473   | 0.091776549  |
| CAT      | 0.004560107  | 0.148616718  | 0.099634564  |
| MAPK1    | 0.221662089  | 0.030695579  | -0.009812664 |
| SMAD7    | 0.148743834  | 0.055295666  | 0.027316397  |
| RRAS     | 0.00300756   | -0.013865056 | 0.233198826  |
| PDHX     | 0.212601044  | -0.052560001 | 0.057298768  |
| PPP2CA   | 0.075504453  | -0.005335179 | 0.089882002  |
| DLAT     | 0.120287562  | -0.008211651 | 0.036336498  |
| SMAD3    | 0.258119156  | -0.126642669 | 9.08E-04     |
| ANAPC2   | -0.070227238 | 0.078317086  | 0.110305149  |
| IKBKG    | 0.057115161  | 0.058224237  | 0.002459369  |
| TBK1     | 0.018053087  | 0.030538596  | 0.009157264  |
| PIK3R4   | 0.010699045  | 0.090345093  | -0.060567214 |
| HBP1     | -0.081208439 | 0.045935597  | 0.054667177  |
| HIPK2    | -0.061926528 | 0.003455058  | 0.07595606   |
| PPP2R3A  | 0.145392789  | -0.107399753 | -0.029465068 |
| PPP2CB   | 0.056762311  | -0.054069684 | 0.00434599   |
| ANAPC13  | -0.180124047 | 0.086943939  | 0.076594474  |
| DLD      | 0.049251378  | -0.03645182  | -0.032913526 |
| RASD2    | 0.022089258  | -0.032389104 | -0.016231449 |
| PPP2R5D  | -8.32E-04    | -0.057881775 | 0.009499641  |
| ITSN2    | 0.019302217  | 0.074093007  | -0.18117481  |
| MCU      | 0.152503966  | -0.150964791 | -0.128662994 |
| AKT3     | -0.01809565  | -6.51E-04    | -0.111372156 |
| ITPR2    | -0.199729931 | 0.119266462  | -0.051264905 |
| PPP2R5E  | -0.023212327 | -0.081575509 | -0.03347001  |
| ACVR2B   | -0.074350502 | 0.09982872   | -0.165941783 |
| PTPA     | -0.160427049 | 0.045834178  | -0.027739403 |
| VHL      | -0.079592436 | -0.026324454 | -0.041736206 |
| PIK3C2B  | 0.019045075  | 0.020324453  | -0.189888084 |
| ACVR2A   | -0.105596813 | 0.010274898  | -0.069500935 |
| SIRT1    | 0.011541157  | -0.082676161 | -0.109115288 |
| CAPN10   | -0.050920663 | 0.003550243  | -0.159235188 |
| RBL2     | -0.099092823 | 0.048793761  | -0.159814515 |
| HRAS     | -0.03164106  | -0.089585394 | -0.119905972 |

|          |              |              |              |
|----------|--------------|--------------|--------------|
| PHF1     | -0.287680639 | 0.042775563  | -0.004926103 |
| PDHA1    | -0.032185315 | -0.063839088 | -0.156902061 |
| KRAS     | -0.067099296 | -0.112836262 | -0.117752351 |
| ASXL2    | -0.104221548 | 0.0363642    | -0.240026967 |
| PIK3R5   | -0.422375667 | 0.385062402  | -0.296914071 |
| CREBBP   | -0.027795524 | -0.135234586 | -0.18878995  |
| ASXL1    | -0.072699157 | -0.093687687 | -0.187126107 |
| PCGF2    | 0.235913239  | -0.211614989 | -0.391483293 |
| CBX8     | -0.181228854 | 0.00486626   | -0.206232432 |
| PIK3CB   | -0.144911066 | -0.033630854 | -0.211910156 |
| EP300    | -0.163839523 | 0.014728121  | -0.278647666 |
| TRAF6    | -0.181693081 | -0.060858993 | -0.19338392  |
| ANAPC7   | -0.219465328 | -0.068745721 | -0.154780469 |
| EIF4E    | -0.105842951 | -0.150840581 | -0.195814047 |
| MAP2K5   | -0.218358004 | -0.017241041 | -0.218879285 |
| FOXO4    | -0.257799483 | 0.024722634  | -0.247499208 |
| PCGF1    | -0.220379596 | -0.120081099 | -0.145860113 |
| DHCR24   | -0.195703521 | -0.114174645 | -0.189413368 |
| PIK3CA   | -0.091661082 | -0.096259887 | -0.3151092   |
| CHUK     | -0.102068911 | -0.119971758 | -0.285012499 |
| MAPKAPK3 | -0.47693973  | 0.08931424   | -0.121048567 |
| PIK3R2   | 0.047898209  | -0.205261334 | -0.375819124 |
| CACNG6   | -0.569295726 | 0.294072503  | -0.263517338 |
| CDC23    | -0.147606902 | -0.115528253 | -0.275825494 |
| CAPN5    | -0.180621131 | -0.093115676 | -0.283858647 |
| PIK3CD   | -0.400234197 | 0.232056505  | -0.390273705 |
| MAPK3    | -0.431500479 | 0.043781863  | -0.176277534 |
| RAP2B    | -0.100382628 | -0.097691328 | -0.379417474 |
| MAPK14   | -0.139197693 | -0.099072582 | -0.356863576 |
| PTEN     | -0.079101365 | -0.17070878  | -0.368207623 |
| ANAPC11  | -0.371344688 | 0.021453786  | -0.284763213 |
| FZR1     | -0.328081952 | -0.078825963 | -0.255428648 |
| TLR2     | -0.847521042 | 0.033495067  | 0.135115175  |
| CDC16    | -0.251783617 | -0.20327469  | -0.251981924 |
| CACNA1S  | -0.819111167 | 0.192104745  | -0.081732317 |
| GADD45A  | 0.223720883  | -0.633767917 | -0.315938555 |
| MAP2K2   | -0.341351032 | -0.113776902 | -0.327055908 |
| E2F5     | -0.298110378 | -0.076363778 | -0.426648288 |
| CAPN2    | -0.256169699 | -0.239945275 | -0.335274516 |
| PPP2R5A  | -0.238755344 | -0.136252229 | -0.458721699 |
| ASXL3    | -0.182771654 | -0.321582432 | -0.353281567 |
| PDK3     | -0.387251566 | -0.060541403 | -0.413795399 |
| ANAPC4   | -0.339898467 | -0.125556112 | -0.402271322 |
| RALA     | -0.291329662 | -0.18280058  | -0.411764281 |
| PCGF6    | -0.260041989 | -0.196928172 | -0.429853629 |
| PIK3CG   | -0.647008186 | 0.274553437  | -0.516621285 |
| NBN      | -0.325511164 | -0.281191372 | -0.283465928 |
| SMAD6    | -0.650908443 | 0.075106685  | -0.322911922 |
| CDC26    | -0.418578037 | -0.120441379 | -0.364125994 |
| EP400    | -0.3932271   | -0.117180007 | -0.400551888 |
| IKBKB    | -0.486657253 | 0.04563912   | -0.513543973 |
| RAP1A    | -0.553735138 | -0.031423322 | -0.439828779 |
| TGFBR1   | -0.486182368 | -0.109809299 | -0.432396642 |
| ATR      | -0.498440839 | -0.078353968 | -0.462925719 |
| MAPK6    | -0.263962713 | -0.368141749 | -0.451463818 |
| MAPKAPK5 | -0.407942428 | -0.202122672 | -0.503306311 |
| AKT2     | -0.356113282 | -0.199678196 | -0.578220962 |
| IRF3     | -0.636160022 | -0.027052461 | -0.502590589 |
| CAPNS1   | -0.548789217 | -0.173216462 | -0.449670321 |
| PIK3C2A  | -0.502466117 | -0.23585189  | -0.439350113 |
| IKBKE    | -1.036014372 | 0.361096041  | -0.505404541 |
| CDC27    | -0.452009413 | -0.207266893 | -0.530648696 |
| CDKN1B   | -0.455854568 | -0.174694093 | -0.564699342 |



|          |              |              |              |
|----------|--------------|--------------|--------------|
| ACVR1    | -0.052823127 | -0.500415385 | -0.642543378 |
| ELF2     | -0.583835343 | -0.095214027 | -0.543322622 |
| ANAPC5   | -0.511604536 | -0.179941583 | -0.54350463  |
| ANAPC10  | -0.567855571 | -0.252288396 | -0.434531483 |
| PARP1    | -0.437104753 | -0.22773542  | -0.623991093 |
| RNF2     | -0.37622953  | -0.297306947 | -0.623756423 |
| KAT2B    | -0.69517775  | -0.102562399 | -0.522744038 |
| RALB     | -0.582960858 | -0.255191052 | -0.489656968 |
| E2F6     | -0.525538378 | -0.241174245 | -0.568176961 |
| SMAD2    | -0.475409272 | -0.267961213 | -0.601765538 |
| E2F3     | -0.377261466 | -0.262946575 | -0.718628523 |
| RAP1B    | -0.560115139 | -0.227694535 | -0.628214466 |
| ANAPC1   | -0.574798252 | -0.255238139 | -0.609521386 |
| MAPK7    | -0.565431326 | -0.304237897 | -0.600269649 |
| SMAD1    | -0.579320523 | -0.306858269 | -0.632035694 |
| RAF1     | -0.57265791  | -0.259895568 | -0.6939944   |
| ING1     | -0.572873225 | -0.295602464 | -0.693540499 |
| ZFP36L1  | -0.690214564 | -0.184532127 | -0.721465894 |
| TGFBR2   | -0.901983488 | -0.1228667   | -0.601334906 |
| MAPKAPK2 | -0.599091678 | -0.278191373 | -0.75012849  |
| RPS6KA4  | -0.52251997  | -0.306217392 | -0.842791851 |
| MRE11    | -0.676494197 | -0.181589771 | -0.8393676   |
| PPP2R1B  | -0.566608976 | -0.256771668 | -0.892147677 |
| MAP2K6   | -0.80428282  | -0.182524424 | -0.787358838 |
| TGFB1    | -0.776918402 | -0.171910711 | -0.839869491 |
| CEBPB    | -0.980339236 | -0.202040122 | -0.606707479 |
| NFAT5    | -0.652131739 | -0.249876195 | -0.890958419 |
| CCND2    | -0.704402088 | -0.102412742 | -1.001093716 |
| ELF1     | -1.021168441 | 0.032958467  | -0.821751009 |
| NRAS     | -0.704373148 | -0.298063564 | -0.825451221 |
| EED      | -0.797490228 | -0.229453958 | -0.845473235 |
| E2F4     | -0.615773775 | -0.352428677 | -0.91193334  |
| PPP1CA   | -0.824747812 | -0.224812371 | -0.881193911 |
| NFATC1   | -0.953073103 | -0.154249265 | -0.862187568 |
| SMAD4    | -0.776245656 | -0.374666121 | -0.865694718 |
| CCNE1    | -0.92727506  | -0.056199834 | -1.046675115 |
| NFKB2    | -1.205269122 | -0.188087575 | -0.74226866  |
| SMAD5    | -0.846717854 | -0.454308257 | -0.842439911 |
| CCNE2    | -0.919314193 | -0.375045473 | -1.065204001 |
| AKT1     | -0.993383133 | -0.444645575 | -1.033339036 |
| CCND3    | -1.095864522 | -0.291159195 | -1.099233178 |
| RRAS2    | -1.03558019  | -0.428103119 | -1.130924254 |
| ATM      | -1.213606221 | -0.069835186 | -1.335160233 |
| NFKB1    | -1.367641583 | -0.259909523 | -1.077869284 |
| PHF19    | -1.321401154 | -0.07870484  | -1.356256267 |
| RAD50    | -1.162269875 | -0.339276314 | -1.279987544 |
| CAPN1    | -1.28145416  | -0.252652369 | -1.282118951 |
| ITPR3    | -1.642588713 | 0.07355267   | -1.310977837 |
| ELF4     | -1.806282431 | -0.016145651 | -1.464797805 |
| MAP2K3   | -1.041692264 | -0.570656724 | -1.696510333 |
| ETS1     | -1.675068289 | -0.342944928 | -1.471714837 |
| MAPK12   | -1.347128396 | -0.567704996 | -1.763668756 |
| CDC25B   | -1.40553463  | -0.497165032 | -1.79263753  |
| PML      | -1.918291227 | -0.180933577 | -1.621533893 |
| CDC25A   | -1.683285735 | -0.394434684 | -1.661744809 |
| STING1   | -2.21798913  | -0.162013599 | -1.410534832 |
| ELK3     | -1.800906942 | -0.453130796 | -1.656243168 |
| TP53     | -1.681008404 | -0.52601342  | -1.710998123 |
| CHEK2    | -1.945233057 | -0.301301618 | -1.773494946 |
| NFATC3   | -1.845793142 | -0.439612534 | -1.906553372 |
| CBX2     | -1.684048295 | -0.538277193 | -2.195716462 |
| CCNB2    | -2.13659522  | -0.454073888 | -1.955505264 |
| E2F1     | -1.675956595 | -0.64131848  | -2.294678651 |

|          |              |              |              |
|----------|--------------|--------------|--------------|
| CDK4     | -2.134962858 | -0.62544318  | -2.176814786 |
| TGFB3    | -1.945814345 | -0.945444709 | -2.229942954 |
| RBL1     | -2.685664958 | -0.310912555 | -2.15185355  |
| NFATC4   | -2.36472549  | -0.767474139 | -2.263926338 |
| CCND1    | -2.27317279  | -0.645794468 | -2.621422746 |
| EIF4EBP1 | -2.611489484 | -0.580813572 | -2.48099038  |
| CDK2     | -2.657205383 | -0.528806637 | -2.531673086 |
| CHEK1    | -2.622894219 | -0.552810179 | -2.679696407 |
| CGAS     | -2.830785645 | -0.519173525 | -2.572173423 |
| EZH2     | -2.546777073 | -0.702365676 | -2.723164287 |
| CDK6     | -2.909893903 | -0.442741562 | -2.788228297 |
| E2F7     | -2.886712179 | -0.661076527 | -2.622296242 |
| E2F2     | -3.539845688 | -0.398432161 | -2.707423417 |
| CDC25C   | -3.787258305 | -0.586902872 | -3.824673236 |
| CDK1     | -3.829241097 | -0.764668323 | -3.892110555 |
| CCNB1    | -4.022396059 | -0.700716311 | -4.442363326 |
| E2F8     | -4.314112131 | -0.795762362 | -4.13040976  |
| CDKN2A   | -4.845143498 | -0.663105285 | -4.532509214 |
| CAPN6    | -4.605798295 | -0.833467665 | -4.61253477  |
| GATA4    | -7.257455177 | -0.959911669 | -5.277100139 |

|          | CT-2A Vehicle Vs. D2C7 | CT-2A Vehicle Vs. CD40 | CT-2A Vehicle Vs. D2C7+CD40 |
|----------|------------------------|------------------------|-----------------------------|
| Saa3     | 2.304398429            | 2.192418285            | 3.83689231                  |
| GADD45B  | 3.634460603            | 0.162990449            | 3.681979502                 |
| IL6      | 2.632672241            | 1.601615073            | 2.283232881                 |
| CAPN11   | 2.738380934            | 1.687172539            | 1.150424053                 |
| CDKN1A   | 2.330418832            | 0.092662149            | 1.982073028                 |
| RASD1    | 1.443070702            | 0.838043739            | 2.02678727                  |
| SERPINE1 | 2.736227657            | -0.133784215           | 1.081734217                 |
| MAPK15   | 0.969666329            | 1.118421575            | 1.507875454                 |
| ATF3     | 1.917661038            | -0.626503269           | 2.076538077                 |
| CACNA1F  | 1.399390265            | 0.29116678             | 1.597816194                 |
| IL1A     | 0.883734947            | 0.386092208            | 1.796502767                 |
| GADD45G  | 1.160469349            | -0.263707309           | 1.59251937                  |
| PPP3R2   | 0.98273232             | 0                      | 1.423174001                 |
| SMAD9    | 1.059413806            | 0.321706532            | 0.986822708                 |
| PIK3R6   | 1.020605698            | 0.837835623            | 0.465582298                 |
| MAPK4    | 0.975245459            | 0.193832407            | 0.935912424                 |
| CACNG2   | 0.968376438            | 0.251936663            | 0.870067185                 |
| BHLHE40  | 1.100610002            | 0.200868659            | 0.770851076                 |
| PPP2R2C  | 1.045785572            | 0.227893879            | 0.555215442                 |
| CACNA1A  | 0.980544053            | 0.170335441            | 0.670509049                 |

“N/A” values were changed to 0. The z scores of each row were summed, then the summed values were ranked from highest to lowest. A heatmap of the rows containing the top 20 summed values was created using GraphPad Prism version 9.
