# Supplementary material
Source: PubMed Central journal article supplement (PMC10440725)
Supplement: NIHMS1923415-supplement-Table_S3_.pdf [file NIHMS1923415-supplement-Table_S3_.pdf]

| Target            | Species Reactivity     | Clone   | Company                   | Catalog #  |
|-------------------|------------------------|---------|---------------------------|------------|
| Normal Rabbit IgG |                        | DA1E    | Cell Signaling Technology | 3900       |
| CD4               | Mouse/Rat              | D7D2Z   | Cell Signaling Technology | 25229      |
| CD8a              | Mouse                  | D4W2Z   | Cell Signaling Technology | 98941      |
| CD19              | Mouse/Human            | D4V4B   | Cell Signaling Technology | 90176      |
| CD68              | Mouse                  | E3O7V   | Cell Signaling Technology | 97778      |
| CD206             | Mouse/Human/Rat/Monkey | E6T5J   | Cell Signaling Technology | 24595      |
| CD40              | Human                  | BLR056F | Novus Biologicals         | NBP2-76366 |
| Ki-67             | Mouse                  | D3B5    | Cell Signaling Technology | 12202      |
| TNF $\alpha$      | Mouse/Human/Rat        |         | Novus Biologicals         | NBP1-19532 |
