# Supplementary material
Source: PubMed Central journal article supplement (PMC10440725)
Supplement: NIHMS1923415-supplement-Table_S4_.pdf [file NIHMS1923415-supplement-Table_S4_.pdf]

**T Cells**

| Target       | Species     | Fluorochrome    | Clone    | Supplier       | Catalog     |
|--------------|-------------|-----------------|----------|----------------|-------------|
| L/D Blue     |             |                 |          | Thermo         | L23105      |
| B220         | Mouse/Human | APC/Fire 810    | RA3-6B2  | BioLegend      | 103278      |
| CD3          | Mouse       | BUV563          | 145-2C11 | BD Biosciences | 749277      |
| CD4          | Mouse       | BUV496          | GK1.5    | BD Biosciences | 612952      |
| CD8 $\alpha$ | Mouse       | Pacific orange  | 5H10     | Invitrogen     | MCD0830     |
| CD11b        | Mouse/Human | Spark NIR 685   | M1/70    | BioLegend      | 101277      |
| CD11c        | Mouse       | BV480           | N418     | BD Biosciences | 746392      |
| CD39         | Mouse       | Alexa Fluor 488 | Duha59   | BIO-RAD        | MCA4714A488 |
| CD44         | Mouse       | BUV805          | IM7      | BD Biosciences | 741921      |
| CD45         | Mouse       | BUV395          | 30-F11   | BD Biosciences | 564279      |
| CD62L        | Mouse       | BUV615          | MEL-14   | BD Biosciences | 752311      |
| CD69         | Mouse       | PE/Cyanine5     | H1.2F3   | BioLegend      | 104510      |
| LAG3         | Mouse       | PE              | C9B7W    | BioLegend      | 125208      |
| PD-1         | Mouse       | BV605           | 29F.1A12 | BioLegend      | 135220      |
| SLAMF6       | Mouse       | APC             | 330-AJ   | BioLegend      | 134610      |
| TIGIT        | Mouse       | PE/Cyanine7     | 1G9      | BioLegend      | 142108      |
| Tim-3        | Mouse       | BV785           | RMT3-23  | BioLegend      | 119725      |
| IFN $\gamma$ | Mouse       | BV650           | XMG1.2   | BioLegend      | 505832      |
| TNF $\alpha$ | Mouse       | BV785           | MP6-XT22 | BioLegend      | 506341      |

**Myeloid Cells**

| Target         | Species     | Fluorochrome    | Clone       | Supplier       | Catalog     |
|----------------|-------------|-----------------|-------------|----------------|-------------|
| L/D Blue       |             |                 |             | Thermo         | L23105      |
| B220           | Mouse/Human | APC/Fire 810    | RA3-6B2     | BioLegend      | 103277      |
| CD3            | Mouse       | BV570           | 17A2        | BioLegend      | 100225      |
| CD11b          | Mouse/Human | APC-Cy7         | M1/70       | BD Biosciences | 557657      |
| CD11c          | Mouse       | BUV661          | N418        | BD Biosciences | 750449      |
| CD24           | Mouse       | BV711           | M1/69       | BD Biosciences | 563450      |
| CD26           | Mouse       | BV605           | H194-112    | BD Biosciences | 745125      |
| CD45           | Mouse       | BUV395          | 30-F11      | BD Biosciences | 564279      |
| CD49b          | Mouse       | PE-Cy5          | DX5         | E Bioscience   | 15-5971-82  |
| CD80           | Mouse       | PE/Dazzle594    | 16-10A1     | BioLegend      | 104738      |
| CD88           | Mouse       | VioBlue         | 20/70       | Miltenyi       | 130-106-121 |
| CD172 $\alpha$ | Mouse       | BUV563          | P84         | BD Biosciences | 741349      |
| CD206          | Mouse       | Alexa Fluor 700 | C068C2      | BioLegend      | 141734      |
| CX3CR1         | Mouse       | BV785           | SA011F11    | BioLegend      | 149029      |
| F4/80          | Mouse       | PE-Cy7          | BM8         | BioLegend      | 123114      |
| I-A/I-E        | Mouse       | BUV805          | M5/114.15.2 | BD Biosciences | 748844      |
| Ly-6G          | Mouse       | BUV615          | 1A8         | BD Biosciences | 751263      |
| XCR1           | Mouse/Rat   | BV510           | ZET         | BioLegend      | 148218      |
